1 Psychomotor Impairments and Therapeutic Implications Revealed by a Mutation  
2 Associated with Infantile Parkinsonism-Dystonia

3

4 Jenny I. Aguilar<sup>1,2</sup>, Mary Hongying Cheng<sup>3</sup>, Josep Font<sup>4</sup>, Alexandra C. Schwartz<sup>5</sup>, Kaitlyn  
5 Ledwitch<sup>6,7</sup>, Amanda Duran<sup>6,7</sup>, Samuel J. Mabry<sup>2</sup>, Andrea N. Belovich<sup>8</sup>, Yanqi Zhu<sup>2</sup>, Angela M.  
6 Carter<sup>2</sup>, Lei Shi<sup>9</sup>, Manju A. Kurian<sup>10</sup>, Cristina Fenollar-Ferrer<sup>11</sup>, Jens Meiler<sup>6,7,12</sup>, Renae M. Ryan<sup>4</sup>,  
7 Hassane S. Mchaourab<sup>5</sup>, Ivet Bahar<sup>3</sup>, #Heinrich J. G. Matthies<sup>2</sup>, #Aurelio Galli<sup>2</sup>

8

9 <sup>1</sup> Department of Pharmacology, Vanderbilt University, Nashville, TN, USA

10 <sup>2</sup> Department of Surgery, University of Alabama at Birmingham, Birmingham, AL, USA

11 <sup>3</sup> Department of Computational and Systems Biology, School of Medicine, University of Pittsburgh,  
12 Pittsburgh, PA, USA

13 <sup>4</sup> School of Medical Sciences, Faculty of Medicine and Health, University of Sydney, Sydney,  
14 NSW, Australia

15 <sup>5</sup> Department of Molecular Physiology & Biophysics, Vanderbilt University, Nashville, TN, USA

16 <sup>6</sup> Center for Structural Biology, Vanderbilt University, Nashville, TN, USA

17 <sup>7</sup> Department of Chemistry, Vanderbilt University, Nashville, TN, USA

18 <sup>8</sup> Department of Biomedical Sciences, Idaho College of Osteopathic Medicine, Meridian, ID,  
19 USA

20 <sup>9</sup> Computational Chemistry and Molecular Biophysics Section, NIDA, NIH, Baltimore, MD, USA

21 <sup>10</sup> Molecular Neurosciences, Developmental Neurosciences, University College London (UCL)  
22 Great Ormond Street Institute of Child Health, UCL, London, United Kingdom

23 <sup>11</sup> Laboratory of Molecular & Cellular Neurobiology, NIMH, NIH, Bethesda, MD, USA

24 <sup>12</sup> Institute for Drug Discovery, Leipzig University Medical School, Leipzig, Germany

25

26 # equal contribution

27 Correspondence:

28 Aurelio Galli

29 1032 Tinsley Harrison Tower, 1900 University Boulevard, Birmingham, AL 35233

30 [agalli@uab.edu](mailto:agalli@uab.edu)

31 (205) 934-1353

32 **ABSTRACT**

33            Parkinson disease (PD) is a progressive, neurodegenerative disorder affecting over 6.1  
34 million people worldwide. Although the cause of PD remains unclear, studies of highly-penetrant  
35 mutations identified in early-onset familial parkinsonism have contributed to our understanding of  
36 the molecular mechanisms underlying disease pathology. Dopamine (DA) transporter (DAT)  
37 deficiency syndrome (DTDS) is a distinct type of infantile parkinsonism-dystonia that shares key  
38 clinical features with PD, including motor deficits (progressive bradykinesia, tremor, hypomimia)  
39 and altered DA neurotransmission. Here, we define structural, functional, and behavioral  
40 consequences of a Cys substitution at R445 in human DAT (hDAT R445C), identified in a patient  
41 with DTDS. We found that this R445 substitution disrupts a phylogenetically conserved  
42 intracellular (IC) network of interactions that compromise the hDAT IC gate. This is demonstrated  
43 by both Rosetta molecular modeling and fine-grained simulations using hDAT R445C, as well as  
44 EPR analysis and X-ray crystallography of the bacterial homolog leucine transporter. Notably, the  
45 disruption of this IC network of interactions supported a channel-like intermediate of hDAT and  
46 compromised hDAT function. We demonstrate that *Drosophila melanogaster* expressing hDAT  
47 R445C show impaired hDAT activity, which is associated with DA dysfunction in isolated brains  
48 and with abnormal behaviors monitored at high-speed time resolution.

49            We show that hDAT R445C *Drosophila* exhibit motor deficits, lack of motor coordination  
50 (i.e. flight coordination) and phenotypic heterogeneity in these behaviors that is typically  
51 associated with DTDS and PD. These behaviors are linked with altered dopaminergic signaling  
52 stemming from loss of DA neurons and decreased DA availability. We rescued flight coordination  
53 through enhanced DAT surface expression *via* the lysosomal inhibitor chloroquine. Together,  
54 these studies shed light on how a DTDS-linked DAT mutation underlies DA dysfunction and, more  
55 broadly, the clinical phenotypes shared by DTDS and PD.

## 56 INTRODUCTION

57            Parkinson's disease (PD) is the second-most prevalent neurodegenerative disorder,  
58 affecting 2–3% of the global population over the age of 65 (Chai and Lim, 2013). Although a vast  
59 majority of PD cases occur idiopathically and affect people over the age of 50 (late-onset), a  
60 subset of genetic mutations is associated with early-onset PD (Lill, 2016). Investigations of these  
61 highly-penetrant, inherited forms of PD have provided tremendous insights into specific molecular  
62 pathways that underlie neurodegeneration and motor deficits (Trinh and Farrer, 2013).

63            Mutations in the human dopamine (DA) transporter (hDAT) gene (*SLC6A3*) have been  
64 linked to a distinct type of infantile parkinsonism-dystonia, referred to as DA transporter deficiency  
65 syndrome (DTDS) (Kurian et al., 2011; Kurian et al., 2009; Ng et al., 2014). Few patients  
66 diagnosed with DTDS survive to adulthood, with a majority of patients dying in childhood or  
67 adolescence (Kurian et al., 2011; Kurian et al., 2009; Ng et al., 2014). Common to DTDS-linked  
68 DAT variants is a multifaceted loss of DAT function, which includes impaired transporter activity  
69 and decreased expression (Asjad et al., 2017; Beerepoot et al., 2016; Kurian et al., 2011; Kurian  
70 et al., 2009; Ng et al., 2014). However, the structural and functional underpinnings of these  
71 impairments, how they translate to specific behaviors, and whether they can be pharmacologically  
72 targeted remain mostly uncovered.

73            DTDS is a complex movement disorder typically characterized by initial infantile  
74 hyperkinesia (dyskinesia/dystonia) that progresses to a parkinsonian movement disorder  
75 (bradykinesia/tremor) (Kurian et al., 2011; Ng et al., 2014). Other characteristic clinical features  
76 include elevated levels of the DA metabolite homovanillic acid (HVA) in the cerebrospinal fluid  
77 and loss of DAT activity in the basal ganglia, as measured by single-photon emission tomography  
78 of DAT (i.e. DaTSCAN) (Kurian et al., 2011; Kurian et al., 2009; Ng et al., 2014). In DTDS,  
79 increased levels of HVA typically reflect increased DA turnover promoted by higher extracellular  
80 DA levels. This increase in DA levels likely reflects decreased DA clearance mediated either by  
81 loss of DAT activity and/or expression. Other forms of early-onset parkinsonism are also

82 associated with impaired DAT function (Hansen et al., 2014). This includes a patient with early-  
83 onset parkinsonism and attention deficit hyperactivity disorder (ADHD) carrying compound  
84 heterozygous missense mutations in *SLC6A3* that give rise to I321F and D421N substitutions in  
85 the DAT protein (Borre et al., 2014; Hansen et al., 2014). To date, the mechanism through which  
86 altered DAT function underlies parkinsonian phenotypes remains unclear.

87         The DAT is a presynaptic membrane protein that spatially and temporally regulates DA  
88 neurotransmission by mediating the reuptake of DA from the synapse following vesicular release.  
89 Among other roles, DA regulates cognition, emotion, motor activity, and motivation (Bjorklund and  
90 Dunnett, 2007; Giros and Caron, 1993; Palmiter, 2008). Altered DA neurotransmission has been  
91 implicated in several neuropsychiatric and neurological disorders, including ADHD, Autism  
92 Spectrum Disorder (ASD) and PD (Bowton et al., 2010; Bowton et al., 2014; Cartier et al., 2015;  
93 Chai and Lim, 2013; Hamilton et al., 2013; Meisenzahl et al., 2007; Russo and Nestler, 2013;  
94 Swanson et al., 2007). Structural and molecular dynamic (MD) studies suggest that DA transport  
95 occurs via an alternating access model, wherein the transporter alternates between various  
96 “outward-facing” and “inward-facing” conformations (Forrest et al., 2008; Kazmier et al., 2014;  
97 Krishnamurthy and Gouaux, 2012). hDAT can also form an aqueous pore (channel-like mode)  
98 (Bowton et al., 2010; Bowton et al., 2014; Kahlig et al., 2005). We have shown that the frequency  
99 of the hDAT channel-like mode is enhanced by both pharmacological targeting and disease-  
100 associated variants (Bowton et al., 2010; Bowton et al., 2014; Kahlig et al., 2005). Key to this  
101 alternating mechanism is a network of interactions occurring at the extracellular (EC) and  
102 intracellular (IC) transporter face, termed EC and IC gates, respectively.

103         Recent work identified compound heterozygous missense mutations in the *SLC6A3* gene  
104 in a patient who presented with classical DTDS: a mutation in one allele resulted in a R445C  
105 substitution and a mutation in the second allele resulted in a R85L substitution (Ng et al., 2014).  
106 Either mutation, when studied individually, has devastating effects on hDAT activity and  
107 expression (Ng et al., 2014). In this study, we aimed to understand, mechanistically and

108 structurally, how R445C disrupts transport function, the behavioral consequence of this disruption,  
109 as well as whether we could rescue transport function and behaviors with pharmacotherapy. Of  
110 note, DAT has been shown to form both dimers as well as tetramers at the plasma membrane  
111 (Hastrup et al., 2003). Therefore, expression of both mutations in our experimental preparations  
112 would generate several combinations of hDAT oligomers, preventing the association of specific  
113 hDAT impairments and behavioral phenotypes to a specific mutation. Thus, we focused this study  
114 on the R445C mutation.

115 R445 is located close to the cytoplasmic end of TM9, facing the IC vestibule and is part of  
116 a conserved IC interaction network that comprises the IC gate (Khelashvili et al., 2015a; Kniazeff  
117 et al., 2008; Razavi et al., 2018; Reith et al., 2018; Shan et al., 2011). This network is thought to  
118 coordinate conformational rearrangements in DAT throughout the transport cycle (Kniazeff et al.,  
119 2008; Shan et al., 2011). Specifically, the R445-E428 salt bridge is predicted to stabilize the  
120 transition of hDAT to an inward-occluded conformation (Khelashvili et al., 2015a; Penmatsa et al.,  
121 2013; Reith et al., 2018). Previous studies showed that substitutions at R445 impair DAT function  
122 (Asjad et al., 2017; Beerepoot et al., 2016; Ng et al., 2014; Reith et al., 2018). However, how and  
123 whether R445C impacts the structure and the dynamics of the IC gate remains unclear.  
124 Importantly, how the R445C substitution contributes to DA dysfunction in disease and more  
125 specifically, DTDS etiology, is largely unknown.

126 Here, we undertake a close examination of the structural and functional consequences of  
127 the R445C substitution in hDAT. We integrate molecular insights from X-ray crystallography,  
128 electron paramagnetic resonance (EPR), molecular modeling, and molecular dynamic (MD)  
129 simulations to determine, mechanistically, how R445C underlies dysfunction of the DAT IC gate.  
130 Furthermore, we adopt *Drosophila melanogaster* as an animal model to examine whether and  
131 how this hDAT variant supports brain DA dysfunction, loss of DA neurons and behavioral  
132 phenotypes characterized by DTDS. Finally, we assess a pharmacological agent for its ability to  
133 rescue behavioral deficits in *Drosophila* expressing hDAT R445C. Together, this work provides

134 insight into the structural mechanisms underlying DAT dysfunction and the impact of DAT  
135 dysfunction on specific behaviors, as well as on the molecular mechanisms that underlie DTDS  
136 and more broadly, PD pathology.

137

## 138 **RESULTS**

### 139 **hDAT R445C compromises movement vigor in *Drosophila***

140 *Drosophila melanogaster* have provided unique and critical insights on the pathogenic  
141 mechanisms underlying PD (Feany and Bender, 2000; Xiong and Yu, 2018). *Drosophila* PD  
142 models consistently recapitulate essential PD phenotypes, including neurodegeneration as well  
143 as motor and non-motor behavioral deficits (Nagoshi, 2018). In addition, mechanisms that  
144 mediate DA neurotransmission and signaling observed in other phyla are largely conserved in  
145 *Drosophila* (Yamamoto and Seto, 2014). As observed in mammals, *Drosophila* exhibit increased  
146 arousal and hyperactivity, among other stereotypies, when DAT function is altered (Brand and  
147 Perrimon, 1993; Kume et al., 2005; McClung and Hirsh, 1998).

148 In order to understand whether certain DAT dysfunctions are associated with specific  
149 phenotypes in *Drosophila*, we assessed whether the R445C missense mutation in the DAT  
150 promoted behaviors associated with common DTDS phenotypes. We adopted the Gal4/UAS  
151 system to express hDAT WT or hDAT R445C specifically in DA neurons of flies homozygous for  
152 the *Drosophila* DAT null allele (*DAT<sup>fmn</sup>*) (Campbell et al., 2019; Cartier et al., 2015; Hamilton et  
153 al., 2013). This system has two parts: the Gal4 gene, encoding the yeast transcription activator  
154 protein Gal4, and the upstream activation sequence (UAS), a minimal promoter region to which  
155 Gal4 specifically binds to activate the transcription of the gene of interest (in this study, hDAT).  
156 We developed flies where Gal4 expression is driven by the tyrosine hydroxylase (TH) promoter  
157 (TH-GAL4), driving the expression of Gal4 specifically in DA neurons (in flies, octopamine, the  
158 *Drosophila* analog of norepinephrine, does not require TH for synthesis). The gene of interest is  
159 inserted into an attB donor plasmid with a UAS site (Bischof et al., 2007). This approach allows

160 for irreversible integration of the gene of interest into the identical genomic locus *via* an integrase  
161 ( $\phi$ C31) through the integrated phage attachment site, *attP* (the recipient site in the *Drosophila*  
162 genome). This leads to expression of comparable levels of mRNA for transgenes (e.g. hDAT).  
163 These transgenic organisms are generated with no need for mapping of the insertion site (Bischof  
164 et al., 2007).

165 We first determined that utilizing the Gal4/UAS system to express hDAT WT specifically  
166 in DA neurons of *DAT<sup>fmn</sup>* flies does not alter DA-associated phenotypes compared to wild type  
167 animals expressing *Drosophila* DAT (dDAT). To do this, we investigated whether hDAT WT, in  
168 *Drosophila* brains, could support the reverse transport (efflux) of DA evoked by amphetamine  
169 (AMPH) as observed for dDAT. The psychostimulant AMPH evokes DA efflux mediated by the  
170 DAT (Robertson et al., 2009). To measure DA efflux by amperometry, we guided a carbon fiber  
171 electrode into the *Drosophila* brain juxtaposed to the mCherry-tagged posterior inferior lateral  
172 protocerebrum (PPL1) cluster of DA neurons (see below for details) (Shekar et al., 2017) In  
173 **Supplemental Fig. 1A** (top), representative traces display current measurements of AMPH (20  
174  $\mu$ M)-induced DA efflux from this population of neurons from *DAT<sup>fmn</sup>*, dDAT, and hDAT WT fly  
175 brains. Quantitation of correspondent peak currents (**Supp. Fig. 1A, bottom**) demonstrate  
176 comparable efflux for dDAT and hDAT. Cocaine (20  $\mu$ M), a DAT blocker, inhibited the ability of  
177 AMPH to cause DA efflux in hDAT WT brains (**Supp. Fig. 1A, top**). Further, we determined that  
178 uptake of [<sup>3</sup>H]DA in hDAT WT *Drosophila* brains was not significantly different from that measured  
179 in dDAT brains (**Supp. Fig. 1B**). The absence of uptake in the *DAT<sup>fmn</sup>* fly brains shows the  
180 dependence of DA uptake on the DAT.

181 In *Drosophila*, locomotion is regulated by DA neurotransmission as well as DAT function  
182 (Campbell et al., 2019; Cartier et al., 2015; Hamilton et al., 2014; Hamilton et al., 2013; Pizzo et  
183 al., 2014). We have previously demonstrated that AMPH causes changes in locomotion, a  
184 behavior that depends on DAT function/expression (Cartier et al., 2015; Hamilton et al., 2014).  
185 Adult *Drosophila* males were fed a sucrose solution (5 mM) containing either AMPH (1 mM) or



186 vehicle (CTR). Locomotion was measured by beam crossing detection over a 60-minute period.  
187 In *Drosophila* expressing dDAT, AMPH significantly stimulates locomotion (**Supp. Fig. 1C**).  
188 Remarkably, in *DAT<sup>fmn</sup>* flies, AMPH did not increase locomotion (**Supp. Fig. 1C**). These data  
189 demonstrate that in adult *Drosophila*, functional DAT is required for AMPH-induced locomotion.  
190 To support this animal model for studying how changes in hDAT function affects behaviors, we  
191 rescued AMPH-induced locomotion in the *DAT<sup>fmn</sup>* flies by expressing hDAT selectively in DA  
192 neurons using the Gal4/UAS system (**Supp. Fig. 1C**). These data strongly support *Drosophila* as  
193 a model system to test the multiple functions of hDAT *in vivo*.

194 We tested flies for spontaneous locomotor activity and “anxiety”-related behaviors, such  
195 as time spent in or near the center of an enclosure during an open-field test (i.e., center time).  
196 Illustrated are representative trajectories of adult hDAT WT flies (**Fig. 1A, black trace**) and hDAT  
197 R445C flies (**Fig. 1A, blue trace**) assayed in an open-field test for 5-min. We observed no  
198 differences in center time in hDAT R445C flies with respect to hDAT WT flies (**Fig. 1B**; hDAT WT:  
199  $0.016 \pm 0.003$  ( $t/t_{\text{total}}$ ); hDAT R445C:  $0.024 \pm 0.006$  ( $t/t_{\text{total}}$ );  $p > 0.05$ ). We did observe a significant  
200 reduction in spontaneous locomotor activity in hDAT R445C ( $59.7 \pm 6.1$  cm) compared with hDAT  
201 WT flies ( $80.1 \pm 4.2$  cm;  $p = 0.008$ ) (**Fig. 1C**). Given that parkinsonian locomotor deficits can be  
202 characterized by hypokinesia (inability to initiate movement) and bradykinesia (slowed  
203 movement), we dissected the specific locomotor deficits observed in hDAT R445C flies. We  
204 determined the frequency with which specific velocities were explored throughout the test period  
205 (**Fig. 1D**). We defined “initiating movement” as velocity = 0.74 - 0.94 mm/s and “fast movement”  
206 as velocity = 5.3 – 10.0 mm/s and determined their frequency per genotype. hDAT R445C flies  
207 spent  $5.0 \pm 0.3$  % of the testing period initiating movement compared with  $5.2 \pm 0.4$  % for hDAT  
208 WT flies, suggesting hDAT R445C flies did not have difficulty performing this task ( $p > 0.05$ ; **Fig.**  
209 **1E**). In contrast, hDAT R445C flies displayed significantly decreased movement vigor, in fast  
210 movement for only  $9.8 \pm 1.4$  % of the testing period compared with  $14.5 \pm 1.1$  % for hDAT WT

211 flies ( $p = 0.0098$ ; **Fig. 1F**). Together, these data suggest that motor deficits in hDAT R445C flies  
212 are primarily characterized by deficits in movement vigor.

### 213 **hDAT R445C impairs selective coordinated movements**

214 Patients with early-onset as well as sporadic PD often present impairments in coordination  
215 (van den Berg et al., 2000). To understand further the contribution of the DAT to coordinated  
216 motor behaviors, we analyzed a quintessential fly behavior: flight. Various monoamines, including  
217 DA, modulate insect flight (Sadaf et al., 2015). Inhibition of specific TH-positive DA neurons has  
218 been found to compromise flight, including impaired wing coordination and kinematics (Sadaf et  
219 al., 2015). Initiating voluntary flight (take-off) consists of an initial phase of wing elevation, followed  
220 by a second phase of simultaneous left- and right-wing depression and leg extension (Zabalax et  
221 al., 2008). Using a high-speed camera (2,000 fps), we quantified the time that elapsed between  
222 the initiation of wing elevation ( $t = 0$ ) and final take-off from a water surface (**Fig. 2A** and **Supp.**  
223 **Movie hDAT WT**). We found that flight initiation was significantly compromised in hDAT R445C  
224 flies as the corresponding duration of take-off was  $60.9 \pm 8.7$  ms compared with  $36.6 \pm 4.4$  ms for  
225 hDAT WT flies ( $p = 0.03$ ) (**Fig. 2B** and **Supp. Movie hDAT R445C**). To determine whether  
226 impairments in coordination were consistent across multiple modalities, we assessed grooming.  
227 In *Drosophila*, this stereotyped, coordinated movement of the forelegs and hindlegs is prompted  
228 by a mechanical or microbial stimulus and is modulated by dopaminergic neurotransmission  
229 (Pitmon et al., 2016). Interestingly, grooming was not significantly impaired in hDAT R445C flies  
230 ( $116.7 \pm 12.9$  s) relative to hDAT WT flies ( $88.8 \pm 7.7$  s;  $p > 0.05$ ) (**Fig. 2C**). These data suggest  
231 that only specific coordinated movements are impaired in hDAT R445C flies.

### 232 **hDAT R445C flies display DA deficiency**

233 DA dysregulation, specifically the loss of DA signaling, drastically alters the timing, velocity  
234 and fluidity with which movement is executed (Panigrahi et al., 2015; Turner and Desmurget,  
235 2010). We thus sought to determine whether impairments in movement and coordination were

236 driven by altered DA dynamics. We first measured DA content in whole brains of hDAT WT and  
237 hDAT R445C flies. DA content was significantly reduced by  $16.9 \pm 3.2$  % in hDAT R445C ( $21.4 \pm$   
238  $0.8$  ng/mg) relative to hDAT WT brains ( $25.8 \pm 1.0$  ng/mg) ( $p = 0.02$ ) (**Fig. 3A, left**). We also  
239 measured serotonin (5-HT) content, as serotonergic dysfunction has also been associated with  
240 the development of motor and non-motor symptoms in PD (Politis and Niccolini, 2015). We found  
241 that 5-HT content was comparable in hDAT WT ( $67.0 \pm 1.8$  ng/mg) and hDAT R445C ( $60.7 \pm 2.1$   
242 ng/mg;  $p > 0.05$ ) brains (**Fig. 3A, right**).

243 Various *Drosophila* PD models have shown selective neurodegeneration of protocerebral  
244 posterior lateral 1 (PPL1) DA neurons (Barone et al., 2011; Cackovic et al., 2018; Trinh et al.,  
245 2008; Whitworth et al., 2005). These clusters of neurons, which innervate the mushroom and fan-  
246 shaped bodies, are implicated in regulating motivated behaviors as well as reward learning and  
247 reinforcement. Thus, they exhibit parallel functions compared to DA projections from the  
248 substantia nigra to the striatum in mammals (Aso et al., 2012; Berry et al., 2012; Claridge-Chang  
249 et al., 2009; Kirkhart and Scott, 2015; Riemensperger et al., 2011). We assessed the number of  
250 TH-positive PPL1 neurons in hDAT WT and hDAT R445C brains (**Fig. 3B, left**). We found TH-  
251 positive PPL1 neurons to be significantly reduced in hDAT R445C flies ( $9.1 \pm 0.4$ ) relative to hDAT  
252 WT controls ( $11.5 \pm 0.2$ ;  $p < 0.0001$ ) (**Fig. 3B, right**). These data demonstrated that specific motor  
253 deficits are associated with DA deficiency in hDAT R445C flies.

254 To determine the effects of R445C on DAT function, we examined reverse transport  
255 (efflux) of DA evoked by amphetamine (AMPH) in isolated *Drosophila* brains. The  
256 psychostimulant AMPH evokes DA efflux mediated by the DAT. To measure DA efflux, we utilized  
257 amperometry in isolated *Drosophila* brains. We guided a carbon fiber electrode into the brain,  
258 juxtaposed to the mCherry-tagged PPL1 DA neurons (Shekar et al., 2017) (**Fig. 3C, left, red**  
259 **box**). The representative traces displayed are amperometric current measurements of DA efflux  
260 from this population of neurons in hDAT WT and hDAT R445C brains (**Fig. 3C, middle**). Given

261 the DA deficiency in hDAT R445C brains, it was not surprising that AMPH-induced DA efflux was  
262 significantly reduced in hDAT R445C ( $0.76 \pm 0.14$  pA) compared with hDAT WT ( $1.74 \pm 0.37$  pA;  
263  $p = 0.04$ ) brains. Nonetheless, these brains were capable of DA efflux, suggesting that hDAT  
264 R445C can support, at least in part, the reverse transport of DA.

## 265 **Substitutions in LeuT, at the site homologous to R445 in hDAT, disrupt IC network** 266 **interactions**

267 LeuT, the bacterial homolog of hDAT, has provided key insights that have improved our  
268 understanding of  $\text{Na}^+$ /substrate-coupled transport in the neurotransmitter sodium symporter  
269 (NSS) family (Beuming et al., 2006; Yamashita et al., 2005). Integrating data from LeuT crystal  
270 structures, electron paramagnetic resonance (EPR), single-molecule fluorescence energy  
271 transfer (sm-FRET) and MD simulations has defined the alternating access mechanism used by  
272 the NSS family to transport substrate. Common to these models is the transition from outward-  
273 facing open (OF) to inward-facing open (IF) states through the opening and closing of the EC and  
274 IC gates, respectively (Claxton et al., 2010; Kazmier et al., 2014). Here, we use a combination of  
275 Rosetta modeling, X-ray crystallography and EPR spectroscopy to determine the consequence  
276 of hDAT mutations at R445 on conformational changes in LeuT.

277 Previous studies of LeuT conformational dynamics have shown that the network of  
278 interactions between the N-terminus (residues R5, E6, W8), TM6/IL3 (Y265, Y268), TM8 (D369)  
279 and TM9 (R375) are key to occluding the IC vestibule in the outward-facing occluded (OO) state  
280 (Cheng and Bahar, 2014). In particular, salt bridges R5-D369 and E6-R375 stabilize the N-  
281 terminus in the OO state, as illustrated in **Fig. 4A (left)**. The residues participating in this network  
282 are highly conserved across the NSS family, and are thus, likely critical to transport. First, we  
283 determined the effects of substitutions at the LeuT residue corresponding to R445 of hDAT, R375  
284 in LeuT: LeuT R375A, LeuT R375D, and LeuT R375C. We constructed molecular models of  
285 LeuT R375A and R375D (**Fig. 4A**) using Rosetta to determine potential changes in these  
286 interactions and in the thermodynamic stability ( $\Delta\Delta G$ ) of these variants relative to WT. We found

287 that both neutralizing and acidic substitutions at R375 likely promote the dissociation of the E6-  
288 R375 salt bridge (closest atom-atom distances: WT= 2.1 Å; R375A = 5.4 Å; R375D = 4.2 Å),  
289 weaken the interaction of R375 and I184 (closest atom-atom distances: WT = 2.5 Å; R375A = 6.0  
290 Å; R375D = 4.7 Å), and decrease the thermodynamic stability of LeuT (Rosetta scores: R375A =  
291 + 4.4 REU; R375D = + 5.6 REU relative to WT) (**Supp. Fig. 2A - B, Fig. 4A**). Other interactions  
292 were largely preserved, including R5-D369 and E6-I187 interactions (**Fig. 4A**). One difference  
293 between these models was that K189 moved towards E6 in LeuT R375A, but away from E6 in  
294 LeuT R375D (**Supp. Fig. 2A**). Together, these models predicted that both acidic and neutral  
295 mutations at the LeuT counterpart (R375) of hDAT R445 disrupt the interactions near the IC  
296 vestibule, partially affecting the IC gate, but maintaining other IC network interactions. We also  
297 generated a model for LeuT R375C, and found that K189 also moves away from E6. We conclude  
298 that a cysteine mutation at R375 more closely resembles an acidic substitution (compare **Fig. 4A**  
299 and **Supp. Fig. 2A, C**). However, it has to be noted that cysteine residues exist at an equal ratio  
300 of protonated (neutral) to deprotonated (acidic) states at physiological pH. The root-mean-square  
301 deviation (RMSD) was calculated to show the correlation between the energy-optimized models  
302 and the experimental model (**Supp. Fig. 2D**).

303 To define further the structural consequences of R375 substitutions, we determined the  
304 X-ray crystal structures of LeuT WT, LeuT R375A and LeuT R375D solved in the L-Ala and Na<sup>+</sup>  
305 bound OO conformation to a resolution of 2.1 Å for WT and R375A, and 2.6 Å for R375D (**Fig.**  
306 **4B**, detailed in **Supp. Fig 3**). Unfortunately, the expression of the R375C mutant was low and  
307 protein yield was insufficient for crystallography. Structures were aligned with a previous structure  
308 of LeuT WT in an OO conformation (PDB ID: 3F3E) with an RMSD of 0.134, 0.146 and 0.236 for  
309 LeuT WT, R375A and R375D, respectively. In all structures (*superimposed*), L-Ala, Na1 and Na2  
310 (*purple spheres*) could be modeled into their respective binding sites (**Fig. 4B, left**). These crystal  
311 structures showed that R375A and R375D substitutions in LeuT (**Fig. 4B**) precluded salt bridge  
312 formation between R375 and E6, and between R375 and the backbone of I184 as was also

313 observed with Rosetta modeling in **Fig. 4A**. In addition, K189 moved towards E6 by 3.4 Å,  
314 reducing the distance between residues K189 and E6 from 8.0 Å in LeuT WT to 4.6 Å in LeuT  
315 R375A (**Fig. 4B, middle bottom**), in agreement with Rosetta modeling. The distance between  
316 residues R5 and D369, and between residues E6 and I187, was conserved in all three structures  
317 (**Fig. 4B, right bottom**), as also found with Rosetta modeling (**Fig. 4A**). As evident from these  
318 data, as well as the REU versus RMSD plots (**Supp. Fig. 2D**), our Rosetta models parallel our  
319 crystal structures. In addition, these data indicate that the IC gate is disrupted by substitutions at  
320 position R375 as a result of molecular rearrangements more complex than previously  
321 hypothesized (Reith et al., 2018).

### 322 **R375 substitutions disrupt alternating access in LeuT**

323 To monitor impact of R375 substitution on the ligand-dependent conformational dynamics  
324 of the EC and IC gates, we used EPR, and more specifically, double electron-electron resonance  
325 (DEER), to obtain distance distributions between spin label pairs 309/480 and 7/86 (**Fig. 5A, left**  
326 **and right, respectively**). These spin label pairs are used to monitor the isomerization of LeuT  
327 between the OF, OO, IF and inward-facing occluded (IO) states, as previously described  
328 (Campbell et al., 2019; McHaourab et al., 2011). It is important to note that the spin labels were  
329 attached at introduced cysteines, hence precluding the investigation of LeuT R375C. Instead, we  
330 monitored the effects of R375A and R375D substitutions on LeuT conformational dynamics. We  
331 found that these substitutions had relatively minor effects on the EC gate (309/480 pair). In the  
332 absence of ion and substrate (Apo), LeuT WT dwells between OO and OF conformation, with OO  
333 being predominant (**Fig. 5B, left; black trace**). Na<sup>+</sup> enhances the OF conformation poised to bind  
334 substrate (**Fig. 5B, left; red trace**) (Claxton et al., 2010). Leu binding to Na<sup>+</sup>-bound LeuT restores  
335 the conformational preference to the OO form (**Fig. 5B, left; blue trace**). We found that the  
336 introduction of an Ala (**Fig. 5C, left**) or Asp (**Fig. 5D, left**) at position R375 did not drastically affect  
337 the EC gate in the Na<sup>+</sup>/Leu intermediate (*blue trace*) but, longer-distance components are  
338 sampled in the Apo (*black trace*) and Na<sup>+</sup> (*red trace*) forms. In R375D, the probability distribution

339 of the dominant short-distance component (OO) decreased, such that more open intermediate  
340 distances were sampled in the Apo state (*black trace*) (**Fig. 5D, left**).

341 More substantial changes were observed on the IC gate. Consistent with previous findings,  
342 the spin label pair monitoring of the IC gate in LeuT WT showed a bimodal distribution between  
343 IF and IO conformations in the Apo state (*black trace*), whereas Na<sup>+</sup> alone (*red trace*) begins, and  
344 Na<sup>+</sup>/Leu (*blue trace*) completes, biasing LeuT towards the IO conformer (**Fig. 5B, right**). The  
345 substitution R375A increased the probability of an IF conformation only in the Apo (*black trace*)  
346 and Na<sup>+</sup>/Leu states (*blue trace*) (**Fig. 5C, right**). Similarly, R375D suppressed the short-distance  
347 component (IO conformation) in favor of an IF conformation in the Apo state (*black trace*) (**Fig.**  
348 **5D, right**). The addition of Na<sup>+</sup> was able to partially rescue the probability distribution of the IO  
349 conformer, where Na<sup>+</sup>/Leu resets the IC gate to the IO conformation (**Fig. 5D, right**).

350 Together, DEER distance distributions demonstrate that the substitution of R375D leads to  
351 increased probability of open conformations on both sides of the transporter. This may suggest  
352 the population of a channel-like state consistent with the prediction from MD simulations described  
353 below.

#### 354 **R445 substitutions lead to the intermittent formation of a channel-like intermediate in hDAT**

355 To determine the structural and dynamic changes induced by a R445C substitution in  
356 hDAT, we generated homology models of hDAT based on dDAT structures (PDB ID: 4M48). As  
357 illustrated in **Fig. 6A**, salt-bridges at the IC surface (e.g. R445-E428 and R60-D436), a cation- $\pi$   
358 interaction between R60 and Y335, and a hydrogen bond between E428 and Y335, form an IC  
359 network of interactions that stabilizes the occlusion of the IC vestibule in hDAT WT (**Fig. 6A**)  
360 (Cheng and Bahar, 2015; Kniazeff et al., 2008; Shan et al., 2011). *In silico* studies have suggested  
361 that disruption or reconfiguration of these IC salt bridges facilitate the opening of the IC vestibule  
362 for release of substrate or ions (Cheng and Bahar, 2015; Khelashvili et al., 2015b). This feature  
363 has also been noted in the human serotonin transporter (hSERT) in recent cryo-EM structures  
364 (Cheng and Bahar, 2019; Coleman et al., 2019).

365           The structural model generated for hDAT R445C showed that this substitution disrupts  
366 this IC interaction network to support an intermittent channel-like intermediate (**Fig. 6B**) which is  
367 characterized by continuous water occupancy in the transporter lumen. Superposition of hDAT  
368 WT and R445C structures (**Fig. 6C**) showed an overall opening of the transmembrane (TM)  
369 helices on the IC face (TM9, *blue arrow*) in hDAT R445C. MD simulations also showed that Na<sup>+</sup>  
370 migrates from either the IC or EC side (**Fig. 6D**), where Na<sup>+</sup> binding occurs prior to the complete  
371 dissociation of R60-D436 salt bridge at 150 ns that is paralleled by the formation of the new E428-  
372 R60 salt bridge (**Fig. 6E**). We also note that the IC-exposed TM1a-TM6b pair retained their  
373 'closed' state (**Fig. 6F**), in contrast to the usual opening of TM1a in the IF state observed in WT.  
374 Finally, Na<sup>+</sup> entry was facilitated by the opening of TM9 and consequent increase in the  
375 interhelical distance between TM9 and TM6b (**Fig. 6F**).

376           Similar channel-like intermediates were observed in hDAT R445A (data not shown) and  
377 R445D (**Supp. Fig. 4A**). In R445D, three Na<sup>+</sup> ions (*cyan, violent and orange spheres*) stabilize  
378 along the solvated transporter lumen: one entering from the IC region, one entering from the EC  
379 region, and one intermittently diffusing from the IC region (**Supp. Fig. 4B**). In contrast, only two  
380 Na<sup>+</sup> binding sites are present in R445C (**Fig. 6B**). It is likely that the dissociation of the R445-  
381 E428 salt bridge promoted by R445D substitution allows E428 to bind an additional Na<sup>+</sup>. In  
382 contrast, in hDAT R445C, E428 finds an alternative partner, R60. These findings point to a unique  
383 feature of the R445 residue, as substitutions associated with DTDS stabilize a channel-like  
384 conformation only observed occasionally in previous simulations (Cheng et al., 2018).

385           We also observe that the dissolution of the R445-E428 salt-bridge weakened the IC  
386 interaction network as a whole. In particular, R445C weakened the association of TM8-TM9 near  
387 the IC entrance, whereby TM9 underwent an outward tilting exposing an egress pathway along  
388 TM8 for Na<sup>+</sup> (or a different cation) (**Fig. 6C**). The outward tilting of TM9 has been observed  
389 previously in the DA-loaded transition from OF to IO states (Cheng and Bahar, 2015).  
390 Furthermore, R455C substitution increases the likelihood that the R60-D436 salt bridge breaks,



391 while promoting the formation of a new salt bridge R60-E428 (**Fig. 6E**) at the expense of breaking  
392 R60-D436 salt-bridge in both runs. This new salt bridge may lock the IC gate in a new  
393 configuration.

#### 394 **hDAT R445C displays reduced expression that is partially rescued by chloroquine**

395 hDAT R445C isolated brains display a reduction in DA content (**Fig. 3A**). Thus, we  
396 determined the expression of hDAT R445C in a heterologous expression system. R445C  
397 substitution reduced the surface expression to  $0.06 \pm 0.01$  of hDAT WT ( $1.0 \pm 0.04$ ;  $p < 0.0001$ )  
398 and the total mature DAT expression to  $0.20 \pm 0.04$  of hDAT WT (marked by #;  $1.0 \pm 0.05$ ;  $p <$   
399  $0.0001$ ) (**Fig. 7A**). Given this reduction in transporter expression, in addition to structural  
400 rearrangements, we suspected that DA uptake would also be impaired. Indeed, [<sup>3</sup>H]DA uptake  
401 kinetics showed that R445C expressing cells have significantly reduced transport capacity with  
402 respect to WT cells, as reflected in the  $V_{\max}$  ( $F_{(1, 15)} = 160.3$ ;  $p < 0.0001$ ) (**Fig. 7B**). However, the  
403 apparent affinity for DA ( $K_m$ ) significantly increased in hDAT R445C relative to WT ( $p < 0.0001$ )  
404 cells, suggesting that conformational changes required for translocation of DA across the  
405 membrane are also affected (**Fig. 7B**). To determine if R445C affected the reverse transport  
406 function of the DAT (DA efflux), we delivered DA (2 mM for 10 min) to the inside of the cell through  
407 a patch-pipette in whole-cell configuration and used amperometry to measure DA efflux in  
408 response to AMPH (10  $\mu$ M) (Belovich et al., 2019). Thus, we were able to load the cells with equal  
409 concentrations of DA despite differences in DA uptake. Consistent with our *ex vivo* brain  
410 amperometric recordings, we found that R445C supported DA efflux, albeit significantly reduced  
411 compared with WT (hDAT WT =  $0.74 \pm 0.09$  pA; hDAT R445C =  $0.28 \pm 0.06$  pA;  $p = 0.001$ ) (**Fig.**  
412 **7C**).

413 We also found that both neutralizing and anionic substitutions at R445 (hDAT R445A and  
414 hDAT R445D) significantly compromised surface DAT ( $p < 0.0001$ ) and mature DAT expression  
415 ( $p < 0.0001$ ) relative to hDAT WT (**Supp. Fig. 5A, Supp. Fig. 6A**). In agreement with this reduction

416 in hDAT surface expression and observed structural impairment, [<sup>3</sup>H]DA uptake was also  
417 significantly reduced in hDAT R445A ( $F_{(5,92)} = 22.7$ ,  $p < 0.0001$ ; **Supp. Fig. 5B**) and hDAT R445D  
418 expressing cells ( $F_{(5,94)} = 42.1$ ; **Supp. Fig. 6B**). Consistent with data from the R445C mutant, we  
419 find that the  $K_m$  of hDAT R445A and hDAT R445D was also significantly increased. Combining  
420 patch-clamp with amperometry (as above), we found that AMPH-induced DA efflux was  
421 significantly compromised in hDAT R445D ( $p = 0.002$ ; **Supp. Fig. 6C**) compared with hDAT WT  
422 cells. Interestingly, we observed that AMPH caused a reduction in the amperometric current in  
423 hDAT R445A compared with hDAT WT cells ( $p = 0.001$ ; **Supp. Fig. 5C**), consistent with AMPH  
424 blocking constitutive DA efflux, as previously noted in other DAT mutations (Bowton et al., 2010;  
425 Mazei-Robison et al., 2008). Together, these data confirm that substitutions at R445 significantly  
426 compromised DAT cell surface expression and function.

427         The severity and onset of clinical phenotypes are associated with residual DAT function  
428 in DTDS (Kurian et al., 2011; Ng et al., 2014). DAT function is related to its expression in hDAT  
429 R445C and other DTDS-associated variants; thus, we assessed the possibility of improving motor  
430 coordination deficits in hDAT R445C flies by enhancing/correcting DAT expression. DAT  
431 expression and degradation are regulated by endocytic, recycling, and lysosomal pathways  
432 (Daniels and Amara, 1999; Loder and Melikian, 2003; Miranda et al., 2007; Wu et al., 2015).  
433 Previous studies have shown that chloroquine (CQ), a lysosomotropic weak base that inhibits  
434 lysosomal activity, limits DAT lysosomal degradation (Cartier et al., 2019; Daniels and Amara,  
435 1999). In DTDS-associated variants, the ratio of mature (glycosylated; mDAT) to immature  
436 (unglycosylated; iDAT) DAT is shifted where the immature form predominates (**Fig. 7A**) (Kurian  
437 et al., 2011), suggesting DAT degradation. Here, we investigated whether inhibition of DAT  
438 lysosomal degradation using CQ could improve this ratio. We found that CQ treatment (1 mM, 4  
439 h) significantly increased the ratio of mature DAT (marked by #) to immature DAT (marked by \*)  
440 in hDAT WT (vehicle:  $1.0 \pm 0.07$ ; CQ:  $1.4 \pm 0.06$ ;  $p = 0.04$ ) as well as in hDAT R445C expressing  
441 cells (vehicle:  $1.0 \pm 0.1$ ; CQ:  $1.6 \pm 0.1$ ;  $p = 0.003$ ) ( $F_{(1,20)} = 18.0$ ) (**Fig. 7D**). As specified above in

442 DTDS, the severity of clinical phenotypes is correlated with DAT function/expression. Thus, we  
443 sought to determine whether the improvement in DAT expression promoted by CQ translated to  
444 improvements in motor phenotypes. We supplemented fly food with either CQ (3 mM, 72 h) or  
445 vehicle for both hDAT WT and hDAT R445C flies and measured the timing of flight initiation. We  
446 found that CQ treatment significantly improved the time for flight initiation in hDAT R445C flies  
447 relative to vehicle ( $F_{(1,29)} = 8.7$ ,  $p = 0.04$ ) (**Fig. 7E**). CQ did not have significant effects on motor  
448 coordination in hDAT WT flies ( $p > 0.05$ ). These data suggest that CQ, by enhancing DAT  
449 expression, can improve flight initiation in hDAT R445C flies, and that when a threshold level of  
450 DAT expression is achieved, further increases in DAT expression do not enhance flight initiation  
451 time.

452

## 453 **DISCUSSION**

454 PD is a multi-system, heterogenous neurodegenerative disorder characterized clinically  
455 by core motor symptoms including resting tremors, bradykinesia, rigidity and postural instability.  
456 As the disease progresses, additional motor symptoms develop, such as impairments in gait and  
457 balance, eye movement control, speech and swallowing, and bladder control. Mood disorders  
458 (e.g. anxiety and depression), sleep disorders (e.g. insomnia, disrupted circadian rhythm),  
459 hyposmia (impaired olfaction), gastrointestinal symptoms and other non-motor features usually  
460 precede full PD diagnosis (Faivre et al., 2019). Additionally, cognitive impairment, including  
461 dementia, typically manifests after diagnosis and progresses steadily over time (McGregor and  
462 Nelson, 2019). Some motor and behavioral symptoms can be alleviated by DA replacement  
463 therapies, such as levodopa (L-DOPA, a DA precursor), DA metabolism inhibitors and DA  
464 receptor agonists (Jenner, 2015). However, as the disease progresses, there is often a “loss of  
465 drug” effect, with symptoms largely refractory to therapeutic interventions (Jenner, 2015). In some  
466 patients, DA replacement can promote new behavioral phenotypes, most commonly: impulse  
467 control disorder (ICD) and DA dysregulation syndrome (DDS). In ICD, patients impulsively or

468 compulsively engage in reward-seeking behaviors, including gambling, eating, or sexual activities  
469 (Weintraub et al., 2010). In DDS, patients display addictive behaviors with dependence or  
470 withdrawal-type symptoms towards their DA medications (Giovannoni et al., 2000). Essential to  
471 developing new pharmacotherapies is understanding the underlying disease pathology.

472         Although the cause of PD is not completely understood, a combination of aging, neuronal  
473 susceptibility, genetic risks and environmental factors have been found to contribute its etiology.  
474 Studies on highly-penetrant mutations identified in familial parkinsonism, as well as candidate  
475 gene and genome-wide association findings in idiopathic PD, have contributed to our  
476 understanding of the molecular mechanisms underlying disease pathology (Trinh and Farrer,  
477 2013). DTDS is a distinct type of infantile parkinsonism-dystonia associated with DAT dysfunction  
478 that shares various clinical phenotypes with PD, including motor deficits and altered DA  
479 homeostasis (Kurian et al., 2011; Kurian et al., 2009; Ng et al., 2014). Investigations on DTDS-  
480 associated DAT variants are essential to understanding the impact of DAT dysfunction on DA  
481 neurocircuits and signaling pathways. Further, these studies may shed light on the molecular  
482 mechanisms that underlie the clinical phenotypes shared by DTDS and PD (Mou et al., 2019).

483         In this study, we define how a specific DAT variant identified in DTDS (R445C) confers  
484 DAT dysfunction as well as impairments in DA neurotransmission and associated behaviors.  
485 R445C alters the structure and gating dynamics of an IC interaction network as well as DAT  
486 expression. In the NSS superfamily, which includes DAT and LeuT, thermodynamic coupling of  
487 substrate and Na<sup>+</sup>-co-transport occurs via an alternating access mechanism that comprises the  
488 opening and closing of the IC and EC gates (Beuming et al., 2006; Yamashita et al., 2005). R445  
489 is aligned to R375 in LeuT, which forms the R375-E6 salt-bridge as part of the IC gate (Cheng  
490 and Bahar, 2014). Our crystallographic data, supported by modeling and  $\Delta\Delta G$  calculations in  
491 LeuT, revealed that substitutions at R375 in LeuT disrupt key IC interactions, including the R375-  
492 E6 salt-bridge, promoting an IF conformation.

493           These findings are consistent with previous *in silico* studies which suggest that the  
494 transition to an IF conformation is defined by the dissolution of IC salt-bridges D369-R5 and  
495 R375-E6 in LeuT (Cheng and Bahar, 2014). Furthermore, from our EPR studies, we surmise that  
496 R375 substitutions disrupt the IC network and bias LeuT to an IF conformation, subsequently  
497 altering transport, which requires LeuT to isomerize toward an OF conformation. We have  
498 previously shown that other mutations associated with neuropsychiatric disorders (i.e.  $\Delta V269$ )  
499 that disrupt this IC network also bias LeuT to an IF conformer, impairing transporter function  
500 (Campbell et al., 2019). It is important to note that in the Apo conformation R375A does not alter  
501 LeuT IC gate to the extent of R375D. This suggests that some variants at this site are more  
502 tolerated, likely due to nearby residues conferring redundant interactions to this IC interaction  
503 network. Indeed, it has been previously noted that the microenvironment surrounding the IC gate  
504 is enriched with putative interaction partners that reinforce this IC network (Kniazeff et al., 2008).  
505 Finally, in the EC gate, R375A promotes longer-distance components sampled in the Apo, Na<sup>+</sup>  
506 and Na<sup>+</sup>/Leu states.

507           Using homology modeling and MD simulations, we were able to uncover the structural  
508 and dynamic changes induced by the R445C mutation in hDAT. In hDAT, R445 forms a salt bridge  
509 with E428, an association that is highly conserved among several eukaryotic NSS members and  
510 is proposed to be part of the IC gate (Reith et al., 2018). Although this association is distinct from  
511 the R375-E6 salt-bridge in LeuT, it is thought to serve similar functions as part of the IC network.  
512 We found that R445C promotes the dissociation of salt-bridge R445-E428, as previously  
513 predicted by Reith and collaborators by using molecular graphics (Reith et al., 2018). However,  
514 our MD simulations demonstrate that, unexpectedly, the R445C mutation also disrupts the R60-  
515 D436 salt bridge and induces intermittent formation of a new salt bridge, E428-R60. These  
516 rearrangements of the IC network give rise to a channel-like intermediate filled with water  
517 molecules. This channel-like intermediate was also observed in hDAT R445D, with an additional  
518 Na<sup>+</sup> binding the transporter from the IC environment. Previous studies have shown that DAT

519 undergoes uncoupled DAT-mediated ionic fluxes (Ingram et al., 2002), as well as reverse  
520 transport of DA (efflux), via channel-like pathways (Kahlig et al., 2005). We have previously  
521 uncovered that the hDAT coding variant A559V, identified in patients with ADHD, supports a  
522 channel-like mode in DAT which is associated with persistent DAT-mediated reverse transport of  
523 DA (DA leak) uncovered by AMPH blockade (Bowton et al., 2014; Mazei-Robison et al., 2008).  
524 This DA leak was also identified in hDAT T356M, a *de novo* missense mutation in ASD (Hamilton  
525 et al., 2013). We conclude that the channel-like intermediate observed in our simulations of R445  
526 substitutions may be associated with a channel-like mode supporting ion fluxes. Interestingly, we  
527 found that a neutral substitution at R445 (hDAT R445A) results in constitutive, anomalous DA  
528 leak blocked by AMPH. These data highlight the possibility that anomalous DA efflux may  
529 increase risk for various psychiatric disorders (Bowton et al., 2010; Hamilton et al., 2013; Hansen  
530 et al., 2014; Mazei-Robison et al., 2008). It is important to note that constitutive DA efflux is not  
531 observed in cells expressing hDAT R445C nor hDAT R445D. This underscores the complexity of  
532 the IC network and the possibility that distinct amino acid substitutions at R445 differentially affect  
533 the IC dynamics, promoting different hDAT functions.

534 Our *in vitro* analysis, combined with our *in silico* data, revealed that impaired DAT R445C  
535 transport capacity stems both from a reduction in transporter expression as well as impaired hDAT  
536 function that reflects compromised DA uptake, but partially supported DA efflux. Our findings are  
537 consistent with previous studies highlighting impaired transporter expression and uptake in hDAT  
538 R445C cells (Asjad et al., 2017; Beerepoot et al., 2016; Ng et al., 2014). In addition, these data  
539 support the idea that the IC gate differentially regulates inward versus outward transport of DA  
540 (Campbell et al., 2019), as R445C supports DA efflux (albeit reduced). In addition, we find that  
541 specific substitutions at this IC interaction network are distinctly tolerated in LeuT versus hDAT,  
542 as has been previously noted with other substitutions at this site (Stolzenberg et al., 2015). In  
543 hDAT, neither neutral (R445A) nor acidic (R445D) substitutions support normal hDAT function.  
544 These findings contrast EPR measurements, which suggest that neutral (R375A) but not acidic

545 (R375D) substitutions are tolerated in LeuT. These findings highlight key differences in the IC and  
546 perhaps redundancy existing in LeuT within this network that is absent in the hDAT.

547         Despite neuroanatomical differences between mammalian and fly brains, increasing  
548 evidence on the evolutionary relationships between molecules, neural networks and organization  
549 within mammalian and invertebrate brains, as well as studies on animal models of disease,  
550 suggest many similarities (Anderson and Adolphs, 2014; Feany and Bender, 2000; Hartenstein  
551 and Stollewerk, 2015; Kaiser, 2015; Nagoshi, 2018; Xiong and Yu, 2018; Yamamoto and Seto,  
552 2014). We used *Drosophila* as an animal model to explore the physiological and phenotypic  
553 consequences of a cysteine substitution at R445 of DAT. Our studies found that hDAT R445C  
554 promotes altered motor and coordinated behaviors in *Drosophila*. Specifically, hDAT R445C  
555 *Drosophila* displayed impaired locomotion that was driven by compromised movement vigor (fast  
556 movement). This behavioral phenotype is parallel to bradykinesia observed in patients with DTDS  
557 and PD (Chai and Lim, 2013; Kurian et al., 2011; Kurian et al., 2009; Ng et al., 2014) as well as  
558 in various mammalian and *Drosophila* models of PD (Feany and Bender, 2000; Nagoshi, 2018;  
559 Taylor et al., 2010).

560         In patients with PD, loss of DA neurons elicits impaired movement and motor symptoms,  
561 as well as compromised fine and gross motor coordination. In flies, flight initiation requires  
562 exquisite sensory-motor integration. A fly first raises its wings to a ready position, and then  
563 subsequently, extends its mesothoracic legs and depresses its wings simultaneously to  
564 coordinate a jump with the initial downstroke (Card and Dickinson, 2008). Here, using a high-  
565 speed camera, we studied flight initiation in a *Drosophila* model of DTDS to understand the effects  
566 of hDAT R445C on sensory-motor integration. We found spontaneous flight initiation to be  
567 significantly delayed in *Drosophila* expressing hDAT R445C. Similarly, recent studies have  
568 observed wing coordination defects in flies with reduced neurotransmitter release from DAergic  
569 neurons (Sadaf et al., 2015). These data suggest that there may be a reduction in DA tone in  
570 hDAT R445C flies that contributes to flight deficits. In addition, we found a disparate repetitive

571 motor behavior that requires fine-motor coordination, grooming, to be unaffected in hDAT R445C  
572 *Drosophila*. These findings point to the phenotypic heterogeneity commonly observed in DTDS  
573 and PD (Faivre et al., 2019; Kurian et al., 2011; Kurian et al., 2009; Lill, 2016; Ng et al., 2014;  
574 Trinh and Farrer, 2013) and suggest that specific coordinated movements are impaired or  
575 alternatively, may present in a progressive nature in this model of DTDS. It is important to note  
576 that this study focused on the motor symptoms exhibited in DTDS and PD. However, whether and  
577 if R445C promotes non-motor deficits, including cognitive impairment and hyposmia, has not been  
578 explored.

579 Our studies in fly brains also demonstrate that the hDAT R445C mutation drives  
580 decreased transporter function (i.e. DA efflux), impaired DA synthesis and reduced TH-labeled  
581 DA neurons. Our findings of diminished transporter function align with our previous *in vitro* findings  
582 showing reduced hDAT R445C expression (Ng et al., 2014). In PD, core motor deficits are  
583 ascribed to the loss of DA neurons in the substantia nigra and their projections to the striatum  
584 (Trinh and Farrer, 2013). To date, neurodegeneration in DTDS has not been studied in depth;  
585 however, given that affected individuals develop parkinsonism-dystonia, including resting and  
586 acting tremor, difficulty initiating movements, bradykinesia and rigidity, it is likely that DA circuits  
587 are affected. To this end, we observed a reduction in TH-labeled DA neurons in hDAT R445C  
588 flies, consistent with various *Drosophila* models of PD that show selective neurodegeneration of  
589 protocerebral posterior lateral 1 (PPL1) DA neurons (Barone et al., 2011; Cackovic et al., 2018;  
590 Trinh et al., 2008; Whitworth et al., 2005). Although these findings suggest neurodegeneration in  
591 PPL1 neurons, given the reduction in measured DA levels, it is also possible that there is an  
592 overall reduction in TH, which limits the labeling of this neuronal population. However, our  
593 behavioral data point to a decrease in DA function, as observed in PD.

594 Together, these findings support a mechanism where reduced DAT-mediated DA  
595 reuptake results in excessive EC dopamine and depleted presynaptic stores. Synaptic  
596 hyperdopaminergia leads to overstimulation of presynaptic D<sub>2</sub> autoreceptors which suppress DA



597 release and down-regulate tyrosine hydroxylase (TH), the rate limiting enzyme in DA synthesis,  
598 thereby, decreasing DA synthesis (Ford, 2014). This mechanism aligns with previous findings in  
599 DAT knockout animals and those with compromised DAT function (DiCarlo et al., 2019; Jones et  
600 al., 1999; Salvatore et al., 2016).

601 DTDS presents in a phenotypic continuum, where clinical phenotypes appear to be  
602 associated with varied, residual DAT function. Thus, higher residual DAT activity is suggested to  
603 reduce symptom severity and/or postpone the age of disease onset (Kurian et al., 2011; Ng et al.,  
604 2014). Previous studies have used pharmacological chaperones that stabilize the DAT in an IF  
605 conformation to rescue transporter expression (Asjad et al., 2017; Beerepoot et al., 2016; Ng et  
606 al., 2014). hDAT R445C function was not consistently rescued with these agents (Asjad et al.,  
607 2017; Beerepoot et al., 2016), in alignment with our EPR and *in silico* data, which showed that  
608 hDAT R445C can isomerize and is even biased toward the IF conformer. In light of previous  
609 studies which showed that CQ inhibits DAT lysosomal degradation (Cartier et al., 2019; Daniels  
610 and Amara, 1999), we tested CQ for its ability to improve motor deficits in hDAT R445C flies. We  
611 found that CQ was able to increase motor coordination in hDAT R445C flies, reducing the time to  
612 initiate flight significantly. This improvement in flight coordination was associated with improved  
613 DAT expression. It is important to note that in some studies, lysosomal dysfunction has been  
614 associated with PD (Chai and Lim, 2013; Trinh and Farrer, 2013). In these instances,  
615 lysosomotropic agents should not be considered, as they may exacerbate disease progression.  
616 In addition, although CQ and other quinines have been used for more than 400 years to treat  
617 malaria and more recently, re-purposed to treat cancer, these agents are not without substantial  
618 adverse side effects (Achan et al., 2011; Weyerhauser et al., 2018). Thus, the use of  
619 lysosomotropic agents, such as CQ, should be considered as therapeutic agents to ameliorate  
620 motor deficits only in specific cases of DTDS.

621 Our study reveals how a specific DAT variant identified in DTDS contributes to DAT  
622 dysfunction and subsequently, how DAT dysfunction supports altered DA neurotransmission as

623 well as behaviors in *Drosophila*. Moreover, this experimental paradigm supports *Drosophila* as a  
624 model system in the study of DTDS, and PD, more broadly. Our investigation on hDAT R445C  
625 provides a blueprint to gain valuable insights into the mechanisms regulating transporter function,  
626 gating and expression, and how dysfunction of these processes translates to abnormal DA  
627 physiology and behaviors.

628

## 629 **METHODS**

630 **Cell culture:** peGFP expression vector was engineered to contain synhDAT WT (hDAT WT),  
631 hDAT R445C, hDAT R445D and hDAT R445A. All vectors were sequenced via Sanger  
632 sequencing to confirm mutations. Vector DNA was transiently transfected into human embryonic  
633 kidney (HEK) cells using Fugene-6 (Roche Molecular Biochemicals) transfection reagent. eGFP  
634 (enhanced green fluorescence protein) was used for cell selection and quantitation of transfection  
635 efficiency. Cells were maintained in a 5% CO<sub>2</sub> incubator at 37°C in Dulbecco's Modified Eagle  
636 Medium (DMEM) supplemented with 10% fetal bovine serum (FBS), 1 mM L-glutamine, 100 U/mL  
637 penicillin, and 100 µg/mL streptomycin. All assays were conducted ~48 h post transfection.

638 **[<sup>3</sup>H] DA uptake assays:** For DA uptake in a heterologous expression system: Cells were washed  
639 in KRH buffer composed of (in mM): 130 NaCl, 25 HEPES, 4.8 KCl, 1.2 KH<sub>2</sub>PO<sub>4</sub>, 1.1 MgSO<sub>4</sub>, 2.2  
640 CaCl<sub>2</sub>, 10 d-glucose, 1.0 ascorbic acid, 0.1 pargyline, and 1.0 tropolone. KRH was titrated to pH  
641 7.3 - 7.4. Cells were equilibrated in KRH at 37°C for 5 min. Saturation kinetics of DA were  
642 measured by incubating cells in a range of 0.1 to 15 µM DA, comprised of a mixture of [<sup>3</sup>H]DA  
643 (PerkinElmer Life Sciences, Waltham, MA) and unlabeled DA. Uptake was terminated after  
644 10 min by washing cells twice in ice-cold KRH buffer. Nonspecific binding was measured in the  
645 presence of 10 µM cocaine. K<sub>m</sub> and V<sub>max</sub> values were derived by fitting Michaelis-Menten kinetics  
646 to specific binding data. For DA uptake in dissected *Drosophila* brains: 2–5 day old males were  
647 collected, anesthetized with CO<sub>2</sub>, and brains were dissected in Schneider's medium (GIBCO) with  
648 1.5% BSA. The retina was removed, and four brains per condition were pooled in Millipore Millicell

649 inserts in 24 well plates. Brains were washed with Schneider's medium, then washed in a standard  
650 fly saline solution (HL3) plus 1.5% BSA and 10 mM MgSO<sub>4</sub>. For 15 min at room temperature,  
651 brains were exposed to 200 nM [<sup>3</sup>H]DA in HL3 plus 1.5% BSA and 115 μM ascorbic acid. Brains  
652 were then washed six times with 1.4 mL HL3 plus 1.5% BSA at 4 °C. Brains were placed into  
653 scintillation vials in 100 μL 0.1% SDS. Scintillation fluid was added to count [<sup>3</sup>H]DA. Nonspecific  
654 binding was measured in the presence of 20 μM cocaine.

655 **Amperometry and patch-clamp electrophysiology:** Cells were washed twice with 37°C Lub's  
656 external solution composed of (in mM): 130 NaCl, 1.5 CaCl<sub>2</sub>, 0.5 MgSO<sub>4</sub>, 1.3 KH<sub>2</sub>PO<sub>4</sub>, 10 HEPES  
657 and 34 d-glucose (pH 7.3 - 7.4; 300-310 mOsm/L). To intracellularly load DA, a programmable  
658 puller (Model: P-2000; Sutter Instruments; Novato, CA) was used to fabricate quartz patch-  
659 pipettes with a resistance of 3-8 mΩ. Pipettes were filled with an internal solution containing (in  
660 mM): 110 KCl, 10 NaCl, 2 MgCl<sub>2</sub>, 0.1 CaCl<sub>2</sub>, 1.1 EGTA, 10 HEPES, 30 d-glucose and 2.0 DA  
661 (pH 7.3 - 7.4; 280-290 mOsm/L). Upon gaining whole-cell access, the internal solution was  
662 allowed to diffuse for 10 min. To record DA efflux, a carbon fiber electrode was juxtaposed to the  
663 plasma membrane of the cell and held at +600 mV. After establishing a baseline, 10 μM AMPH  
664 was added to the bath. Amperometric currents were low pass filtered at 1 Hz (Model: 3382; Krohn-  
665 Hite Corporation; Brockton, MA), sampled at 100 Hz (Model: Axopatch 200B; Molecular Devices;  
666 San Jose, CA), and analyzed off-line using pCLAMP 9 software (Molecular Devices). DA efflux  
667 was quantified as the peak of the amperometric current.

668 **Biotinylation assays:** Cells were washed on ice with 4 °C phosphate-buffered saline (PBS)  
669 supplemented with 0.9 mM CaCl<sub>2</sub> and 0.49 mM MgCl<sub>2</sub>. Cells were incubated in 1.0 mg/ml  
670 sulfosuccinimidyl-2-(biotinamido)ethyl-1,3-dithiopropionate-biotin (sulfo-NHS-SS-biotin; Pierce,  
671 Rockford, IL) in PBS for 20 min at 4 °C. Excess biotin was quenched by incubating cells in 100  
672 mM glycine in PBS for 15 min. Cells were solubilized in radioimmunoprecipitation assay buffer  
673 (RIPA) composed of 150 mM NaCl, 1.0% NP-40, 0.5% Sodium Deoxycholate, 0.1% SDS, 50  
674 mM Tris, 1 mM EDTA, 1 mM EGTA, 1 mM PMSF and protease inhibitors (1:100), and titrated to

675 pH 7.4. Cellular extracts were centrifuged for 30 min at 16,000 × g at 4 °C. The supernatant was  
676 added to immunopure immobilized streptavidin beads (Pierce Chemical Company; Rockford, IL)  
677 and incubated overnight at 4 °C. Beads were extensively washed and eluted in sample buffer.  
678 Samples were processed according to a standard western blot protocol (see below).

679 **Western blotting protocol:** Cells were incubated in vehicle or 1 mM chloroquine (CQ) for 4 h.  
680 Cells were solubilized in RIPA, sonicated and centrifuged. Supernatants were denatured in  
681 sample buffer, run on SDS-PAGE gel and transferred to polyvinylidene fluoride membrane  
682 (PVDF) (Millipore, Bedford, MA). Membranes were immunoblotted for DAT (1:1000) (MAB369;  
683 Millipore), β-actin (1:5000) (A5441; Sigma-Aldrich; St. Louis, MO), and Na-K ATPase (1:100;  
684 Developmental Studies Hybridoma Bank (DSHB), Iowa City, Iowa). The secondary antibodies  
685 used were Li-COR goat anti-rat IRDye 800 (1:15,000), goat anti-rabbit IRDye 680 (1:15,000) and  
686 goat anti-mouse IRDye 680 (1:15,000). Band densities were quantified using Image Studio  
687 (Odyssey Infrared Imaging System (LI-COR, Lincoln, Nebraska).

688 ***Drosophila* Rearing and Stocks:** All *Drosophila melanogaster* strains were grown and  
689 maintained on standard cornmeal-molasses media at 25 °C under a 12:12 h light-dark schedule.  
690 Fly stocks include *w*<sup>1118</sup> ((Bloomington Indiana Stock Center (BI) 6326), TH-GAL4 (BI 8848),  
691 DAT<sup>MB07315</sup> (BI 25547), UAS-mCherry (Kyoto Stock Center 109594), and M[vas-int.Dm]ZH-2A;  
692 (M[3xP3-RFP.attP']ZH-22A (BI 24481) and *DAT*<sup>fmn</sup> (dDAT KO). *Drosophila* expressing  
693 homozygous dDAT null allele *DAT*<sup>fmn</sup> (dDAT KO) (Kume et al., 2005), TH-Gal4 (Friggi-Grelin et  
694 al., 2003), and UAS-mCherry were outcrossed to a control line (*w*<sup>1118</sup>) for 5 - 10 generations and  
695 selected by PCR or eye color. Transgenes (hDAT WT and hDAT RT445C) were cloned into pBID-  
696 UASC (Wang et al., 2012) and constructs were injected into embryos from M[vas-int.Dm]ZH-2A,  
697 M[3xP3-RFP.attP']ZH-22A (BI 24481) (Rainbow Transgenic Flies Inc; Camarillo, CA). Initial  
698 potential transformants were isolated and selected. Flies containing transgenes were outcrossed  
699 to dDAT KO flies (in *w*<sup>1118</sup> background) for 5–10 generations. Age-paired adult male flies (10 days

700 post eclosion) containing a single copy of hDAT WT or hDAT R445C in DA neurons in a *DAT<sup>fmn</sup>*  
701 background were used for all subsequent experiments.

702 ***Drosophila* amperometry assays:** *Drosophila* brains were dissected with surgical forceps in ice-  
703 cold Schneider's *Drosophila* Medium supplemented with 1.5% BSA. Whole brains were placed in  
704 a mesh holder in Lub's external solution (see previous). A carbon fiber electrode was held at +600  
705 mV and inserted juxtaposed to TH-positive PPL1 DA neuronal region. After establishing a  
706 baseline, 20  $\mu$ M AMPH was added to the bath. Amperometric currents were processed as stated  
707 above.

708 ***Drosophila* locomotion analysis:** Spontaneous locomotor activity in an open field was  
709 measured using custom 3D printed activity chambers (1.1 x 1.1 cm). Locomotion was detected  
710 using NIS Elements AR (Melville, NY). Animals were placed in the activity chambers, where  
711 activity was recorded for 5 min following 2-min acclimation period. Data from this test was also  
712 used to measure anxiety-like behaviors. Thigmotaxis, the tendency of an animal to remain close  
713 to the walls of an open field, was measured as the percent of time flies spent in center square  
714 (3.0 x 3.0 mm). Total distance traveled, center time, and velocity distribution were quantified using  
715 MATLAB 2018b (MathWorks; Natick, MA). Velocity thresholds for movement initiation were set  
716 based on the average velocity during non-movement phases ( $\chi + 0.5\sigma = 0.50 + 0.24$  mm/s),  
717 whereas fast movement was determined from the average velocity during the test period ( $\chi + \sigma =$   
718  $2.7 + 2.6$  mm/s).

719 ***Drosophila* grooming analysis:** Flies were observed for a period of 5 min (~19 fps). Forelimb  
720 and hindlimb grooming incidents were quantified per frame, where total grooming time was  
721 calculated as the total number of frames spent grooming.

722 ***Drosophila* flight assay:** Coordinated flight was measured using custom 3D-printed chambers  
723 (3.9 x 1.0 x 1.0 cm) filled with 2600  $\mu$ L of water. Flight initiation was recorded at 2,000 frames per  
724 second using a Phantom v1212 Camera (Ametek; Wayne, New Jersey), after a short acclimation

725 period. Delay in flight initiation was quantified as the time from the outset of the first wing motion  
726 to the coordinated jump response.

727 **HPLC:** Biogenic amines were quantified by the Neurochemistry Core Facility at Vanderbilt  
728 University. Briefly, *Drosophila* brains were dissected quickly in ice-cold PBS and immediately  
729 frozen in liquid nitrogen. Brains were homogenized using a tissue dismembrator in 100 – 750  $\mu$ l  
730 of solvent containing (in mM) 100 TCA, 10 Na, 0.1 EDTA and 10.5% methanol (pH 3.8).  
731 Homogenate was spun (10,000 x g, 20 min) and supernatant was removed for biogenic  
732 monoamines analysis. Biogenic amine concentrations were determined utilizing an Antec Decade  
733 II (oxidation: 0.65) electrochemical detector operated at 33 °C. Supernatant was injected using a  
734 Water 2707 autosampler onto a Phenomenex Kintex C18 HPLC column (100 x 4.60 mm, 2.6  $\mu$ m).  
735 Biogenic amines were eluted with a mobile phase 89.5% of solvent (see previous) and 10.5 %  
736 methanol (pH 3.8). Solvent was delivered at 0.6 ml/min using a Waters 515 HPLC pump. Biogenic  
737 amines elute in the following order: Noradrenaline, Adrenaline, DOPAC, Dopamine, 5-HIAA, HVA,  
738 5-HT, and 3-MT. HPLC control and data acquisition are managed by Empower software.  
739 Isoproterenol (5 ng/mL) was included in the homogenization buffer for use as a standard to  
740 quantify the biogenic amines. Protein concentration was determined by BCA Protein Assay Kit  
741 (ThermoFisher Scientific).

742 **Immunohistochemistry:** Fly brains were dissected in PBS and fixed in 4% paraformaldehyde  
743 for 20 mins at RT. Brains were washed 3 times with PBST (0.3% Triton X100). Brains were  
744 blocked in 1% BSA and 5% normal goat serum. Brains were immunostained for TH (1:200;  
745 Millipore, AB152) and nc82 (1:50; DSHB) overnight at 4 °C, washed and stained with secondary  
746 antibodies Alexa 488–conjugated goat anti-rabbit (1:200; A11034, ThermoFisher Scientific)  
747 and Alexa 566–conjugated goat anti-mouse (1:200, A11031, ThermoFisher Scientific)  
748 overnight at 4 °C. Brains were washed and mounted with ProLong Diamond Anti-Fade  
749 mounting solution (ThermoFisher Scientific). Imaging was performed using a Nikon A1R

750 confocal microscope. The resolution of the image stack was 1024 × 1024 with 0.5 μm step  
751 size. Neurons were counted manually using FIJI (Bethesda, MD).

752 **Rosetta Homology Modeling and Stability Calculations:** The Rosetta Flex  $\Delta\Delta G$  protocol  
753 (Barlow et al., 2018; Kuenze et al., 2019) and the Rosetta Membrane all-atom energy function  
754 (Alford et al., 2015) were used to estimate free energy changes and sample conformational  
755 changes of the LeuT, hDAT and corresponding variants. The Flex  $\Delta\Delta G$  protocol models mutation-  
756 induced conformational and energetic changes through a series of “backrub” moves of the protein  
757 backbone together with side-chain repacking around the mutation site. 15,000 backrub steps were  
758 used in this study to sample backbone and side chain degrees of freedom for neighboring  
759 residues within an 9 Å boundary of the mutation site. This is subsequently followed by side chain  
760 optimization using the Rosetta “packer.” Global minimization of the backbone and side chains  
761 torsion angles is performed with harmonic C $\alpha$  atom-pair distance restraints. The restraints are  
762 used to prevent large structural deviations from the input model. Models are scored with the  
763 Rosetta Membrane all-atom energy function (Alford et al., 2015). This is carried out in parallel for  
764 the WT input model and the mutant of interest. For the LeuT calculations, the LeuT crystal  
765 structure (PDB ID: 2A65) (Yamashita et al., 2005) was used and 1000 independent trajectories  
766 were carried out for both LeuT WT (control) and each variant. For the hDAT calculations,  
767 homology models for hDAT WT were created in the Rosetta molecular modeling suite (revision  
768 57712, Rosetta Commons) as previously described (Campbell et al., 2019) using the *Drosophila*  
769 *melanogaster* DAT (PDB ID: 4XP9) (Wang et al., 2015) as a structural template. 500 independent  
770 trajectories were carried out for each hDAT R445 mutant and hDAT WT (control). This protocol  
771 was used for the top three scoring hDAT homology models resulting in 1500 trajectories total per  
772 mutant. The Rosetta energy change ( $\Delta\Delta G$ ) was calculated as score difference between the  
773 average of the top 5% of LeuT WT and corresponding variants, as well as of hDAT WT and  
774 corresponding variants. Rosetta  $\Delta\Delta G$  values are in Rosetta Energy Units (REU). Representative  
775 structural models for LeuT, hDAT, and all variants were selected for visualization in Pymol by

776 removing outliers and taking the lowest-energy model within the lowest interquartile range of a  
777 box plot.

778 **Protein expression and purification:** Escherichia coli C41 (DE3) cells were transformed with  
779 the pET16b plasmid containing LeuT, LeuT R375A, LeuT R375C or LeuT R375D tagged with a  
780 C-Terminal 8xHis-tag and thrombin cleavage site. Transformed cells were grown in Terrific broth  
781 media to an OD<sub>600</sub> of 0.6. Cells were induced with 0.1 mM isopropyl-β-D-1-thiogalactopyranoside  
782 (20 h, 20 °C), harvested by centrifugation and disrupted with a french press in 20 mM HEPES-  
783 Tris pH 7.5, 190 mM NaCl, 10 mM KCl, 1 mM EDTA, 5 mM L-Alanine, 100 μM AEBSF and 0.004  
784 mg/mL DNase I. Cells membranes were isolated by ultracentrifugation at 200,000 x g (45 min)  
785 and solubilised with 40 mM n-dodecyl-β-D-maltopyranoside (DDM, Anatrace). Solubilised  
786 membranes were incubated with Ni-NTA resin (Qiagen) (1 h, 4 °C). Protein bound to the Ni-NTA  
787 resin was washed with 50 mM imidazole and then eluted with 300 mM imidazole. The histidine  
788 tag was subsequently removed by digestion with thrombin (10 U/mg protein) and the protein  
789 further purified on a size exclusion column in 10 mM Tris-HCl pH 8.0, 45 mM NaCl, 5 mM KCl, 5  
790 mM L-Alanine and 40 mM n-Octyl-β-D-glucopyranoside (OG, Anatrace). Purified protein was  
791 concentrated to 8 mg/mL using 30 kDa cut-off AMICON concentrators (Merck).

792 **Crystallography and structure determination:** Crystals were grown at 18 °C using the hanging-  
793 drop vapor diffusion method, by mixing protein (~8 mg/ml) and well solution (1:1 vol:vol), 100 mM  
794 HEPES-NaOH pH 7-7.5, 200 mM NaCl, 17-22% PEG550 MME. Protein crystals were  
795 cryoprotected by soaking in the well solution supplemented with 25 – 35% PEG550 MME. All  
796 diffraction data was collected on the EIGER 16M detector at the Australian Synchrotron (ACRF  
797 ANSTO) beamline MX2 at a wavelength of 0.954 Å (Aragao et al., 2018). Datasets were indexed,  
798 integrated and scaled using XDS (Kabsch, 2010). Initial phases were obtained by molecular  
799 replacement with Phaser (McCoy et al., 2007) using the structure of LeuT with bound L-Leu (PDB  
800 ID: 3F3E) as the search model. The protein model was built manually in Coot (Emsley et al., 2010)



801 and refined using REFMAC (Murshudov et al., 2011) with TLS and non-crystallographic symmetry  
802 (NCS) restraints (Winn et al., 2001). Phases were further improved by rounds of manual rebuilding  
803 followed by restrained refinement in REFMAC. Validation was carried out using MolProbity (Chen  
804 et al., 2010). Unit cell parameters, data collection and refinement statistics are presented in  
805 Table1. All structural figures were prepared using USCF Chimera (Pettersen et al., 2004).

806 **Electron Paramagnetic Resonance (EPR) protocol:** Cysteine residues were introduced using  
807 site directed mutagenesis into LeuT, LeuT R375A, and LeuT R375D constructs. Experiments  
808 were conducted as in Claxton *et al.* (Claxton et al., 2010). The apo conformation refers to Na<sup>+</sup>  
809 and leucine-free transporter, while the +Na/Leu state was obtained in 200 mM NaCl and 4-fold  
810 molar excess of Leu relative to LeuT. Double Electron Electron Resonance (DEER) (Jeschke and  
811 Polyhach, 2007) was performed at 83K on a Bruker 580 pulsed EPR spectrometer operating at  
812 Q-band frequency using a standard 4-pulse sequence (Zou and McHaourab, 2010). DEER echo  
813 decays were analyzed to obtain distance distributions (Jeschke et al., 2002).

814 **Statistical methods:** Experiments were designed using statistical power calculations considering  
815 means and standard errors from preliminary data. Statistical analyses were performed using  
816 GraphPad Prism 8 (San Diego, CA). Shapiro-Wilk normality tests were performed to determine if  
817 data was normally distributed and F tests were performed to compare variances; parametric or  
818 non-parametric tests with appropriate corrections were chosen accordingly. All data was acquired  
819 unblinded, but analyzed blinded to genotype.

820 **Molecular dynamics (MD) simulations:** The structural model for *apo* hDAT (residues Q58-  
821 D600) in the outward-facing open (OF) unbound state, based on dDAT structure (PDB ID: 4M48),  
822 was taken from previous study (Cheng et al., 2018). Four simulation systems using this initial  
823 structure were constructed: wild-type (WT), R445C, R445A, and R445D. In each case, the  
824 transporter is embedded into 1-palmitoyl-2-oleoyl-sn-glycero-3-phosphocholine (POPC)  
825 membrane lipids using CHARMM-GUI Membrane Builder module (Wu et al., 2014). TIP3P waters  
826 and Na<sup>+</sup> and Cl<sup>-</sup> ions corresponding to 0.15 M NaCl solution were added to build a simulation box

827 of  $\sim 110 \times 110 \times 118$  Å (Phillips et al., 2005). Each simulation system contained  $\sim 131,000$  atoms,  
828 the transporter,  $\sim 300$  lipid molecules, and 27,000 water molecules. All simulations were  
829 performed using NAMD (Phillips et al., 2005) (version NAMD\_2.12) following previous protocol  
830 (Cheng et al., 2018). For each mutant, two independent runs of 200 ns are performed to verify  
831 the reproducibility of the results. VMD (Humphrey et al., 1996) with in-house scripts was used for  
832 visualization and trajectory analysis.

### 833 834 **AUTHOR CONTRIBUTIONS**

835 JIA and AG conceptualized the study. JIA, JF, MHC, ACS, KL, AD, LS, ANB, YZ, and SJM carried  
836 out the experiments. JIA, MHC, JF, ACS, HSM, AMC and KL conducted formal analyses of the  
837 data, prepared the figures and contributed to writing the manuscript. CFF, AMC and MAK  
838 provided guidance, expertise and interpretations of results on select topics. AG, HJGM, JM, RMR,  
839 HSM, and IB acquired funding, supervised the study and interpreted results. All authors  
840 contributed to the editing and review of the manuscript.

### 841 842 **ACKNOWLEDGEMENTS**

843 The authors would like to acknowledge Saunders Consulting for the help in editing this  
844 manuscript. This research was undertaken in part using the MX2 beamline at the Australian  
845 Synchrotron, part of ANSTO, and made use of the Australian Cancer Research Foundation  
846 (ACRF) detector. Research reported in this publication was supported by NIH R01-DA038058  
847 (AG), NIH R01-DA035263 (AG, HJGM), NIH F31-MH114316 (JIA), NIH P41-GM103712 (IB) and  
848 NIH P30-DA035778 (IB), and by the Intramural Research Program of the NIH, NIDA Z1A  
849 DA000606 (LS). The content is solely the responsibility of the authors and does not necessarily  
850 represent the official views of the National Institutes of Health.

### 851 852 **CONFLICTS OF INTEREST**

853 The authors have declared no conflicts of interest.

854

## 855 **FIGURE LEGENDS**

### 856 **Figure 1: R445C variant disrupts locomotive behaviors in *Drosophila***

857 **(A)** hDAT WT or hDAT R445C was selectively expressed in DA neurons in a dDAT KO (*fmn*)  
858 background. Representative trajectories of hDAT WT (*black*) and hDAT R445C (*blue*) flies in an  
859 open-field test during a 5-min test period. 3 x 3 mm square (*red dashed lines*) delineates the  
860 center space. **(B)** hDAT WT and hDAT R445C flies spent comparable time in the center space ( $p$   
861  $> 0.05$ ;  $n = 35$ ). **(C)** hDAT R445C flies traveled significantly less relative to hDAT WT flies ( $p =$   
862  $0.006$ ;  $n = 35$ ). **(D)** Histogram represents instantaneous velocities ranging from 0.74 to 10.0 mm/s  
863 (bin width = 0.094 mm/s; see methods) and corresponding frequencies (number of times) for  
864 hDAT WT (*gray bars*) and hDAT R445C (*blue bars*) flies. Initiating movement velocities (0.74 -  
865 0.94 mm/s, *orange shaded*), fast movement velocities (5.3 - 10.0 mm/s, *green shaded*), average  
866 velocity ( $\bar{x}$ ) are highlighted. **(E)** hDAT R445C flies spent a comparable amount of time initiating  
867 movement relative to hDAT WT flies ( $p > 0.05$ ;  $n = 35$ ). **(F)** hDAT WT flies spent significantly more  
868 time in fast movement compared with hDAT R445C flies ( $p = 0.001$ ;  $n = 35$ ). Data represent mean  
869  $\pm$  SEM. Welch's t-test: (B); Mann-Whitney test (C) and (E - F).

### 870 **Figure 2. R445C variant selectively impairs coordinated motor behaviors, such as take-off,** 871 **but not repetitive motor behaviors, such as grooming**

872 **(A)** Representative single frames of *Drosophila* hDAT WT (*top*) and hDAT R445C (*bottom*) during  
873 various phases of coordinated take-off (video recorded at 2000 fps). **(B)** Flight initiation (take-off)  
874 was quantified from the initial phase of wing elevation ( $t = 0$ ) to the second phase of simultaneous  
875 wing depression and leg extension. Flight initiation was significantly delayed in hDAT R445C flies  
876 relative to hDAT WT ( $p = 0.03$ ;  $n = 10 - 11$ ). **(C)** hDAT R445C flies spent comparable time

877 grooming compared with hDAT WT flies ( $p > 0.05$ ;  $n = 35$ ). Data represent mean  $\pm$  SEM. Welch's  
878 t-test: (B); Mann-Whitney test (C).

879 **Figure 3. Reduced brain DA content and AMPH-induced DA efflux in hDAT R445C flies**

880 **(A)** Tissue concentration of DA (*left*) and 5-HT (*right*) measured by HPLC ( $n = 4$ , 20 brains per  
881 measurement). DA content was significantly decreased in hDAT R445C relative to hDAT WT  
882 brains ( $p = 0.01$ ). 5-HT content in hDAT R445C was comparable to hDAT WT ( $p > 0.05$ ). **(B)**  
883 Confocal z-stack ( $5 \mu\text{m}$ ) of hDAT WT (*left*) and hDAT R445C (*center*) brains co-stained with anti-  
884 TH (*magenta*) and anti-n82 (*cyan*) zoomed-in on PPL1 neurons. Quantitation of TH-positive PPL1  
885 neurons showed a significant reduction of these neurons in hDAT R445C brains relative to hDAT  
886 WT ( $p < 0.0001$ ;  $n = 8 - 11$ ; *right*) **(C)** Diagram illustrates amperometric studies in *Drosophila*  
887 brains in which a carbon fiber electrode records currents from TH-positive PPL1 DA neuronal  
888 region (*red box*) in response to AMPH application ( $20 \mu\text{M}$ ; *left*). AMPH-induced (arrow)  
889 amperometric currents in hDAT WT (*black trace*) and hDAT R445C (*blue trace*) brains.  
890 Quantitation of peak currents showed a significant decrease in DA efflux measured in hDAT  
891 R445C relative to hDAT WT ( $p = 0.04$ ;  $n = 7$ ; *right*). Data represent mean  $\pm$  SEM. Student's t-test  
892 (A)-(B); Welch's t-test: (C).

893 **Figure 4. Representative Rosetta models and crystallographic structures of LeuT revealed**  
894 **weakening of E6-R375 salt bridge promoted by substitutions at R375 (corresponding to**  
895 **R445 in hDAT)**

896 **(A)** Models derived, using Rosetta, of LeuT WT (*left*), LeuT R375A (*middle*) and LeuT R375D  
897 (*right*) where protein backbones are represented as cartoons and residues E6, I184, I187, R5,  
898 and D369 are represented as green spheres and sticks. K189 is colored in blue throughout each  
899 model. R375 is colored in green (*left*). A375 is colored in cyan (*middle*). D375 is colored in yellow  
900 (*right*). All corresponding polar contacts between side chain or backbone atoms in each model  
901 are represented as dashed lines in black. R375 substitution to either Ala or Asp disrupted E6-

902 R375 salt bridge. **(B)** Crystal structures of LeuT WT (*green*), LeuT R375A (*cream*) and LeuT  
903 R375D (*grey*) are superimposed. Box indicates area of zoomed-in view of TM1-TM8 IC region for  
904 LeuT WT (*top left*), LeuT R375D (*top right*), LeuT R375A (*bottom left*) and overlay of three  
905 structures (*bottom right*). Distances between residues are shown in dashed lines.

906 **Figure 5. Asp substitution at R375 in LeuT favors an inward facing conformation**

907 Probability distance distributions ( $P(r)$ ) of the spin labels 308/409 and 7/86 **(A)** reporting the  
908 conformational dynamics of the EC (*left*) and IC (*right*) gate of LeuT, respectively. Distance  
909 distributions for each pair were obtained in the Apo (*black*), Na<sup>+</sup>-bound (Na<sup>+</sup>; *red*), and Na<sup>+</sup>- and  
910 Leu-bound (Na<sup>+</sup>/ Leu; *blue*) conformations for LeuT WT **(B)**, LeuT R375A **(C)** and LeuT R375D  
911 **(D)**.

912 **Figure 6. hDAT R445C favors the opening of the IC vestibule, leading to intermittent**  
913 **formation of a channel-like intermediate.**

914 **(A)** Structure of hDAT WT in the OF state (*white*) illustrates a network of interactions at the IC  
915 surface stabilizing the closure of IC vestibule and solvated EC vestibule (*gray shaded region*). **(B)**  
916 Substitution of R445 with Cys (*orange*) breaks salt-bridge R445-E428, which weakens IC network  
917 interactions and promotes the intermittent formation of a channel-like intermediate. This  
918 conformation favors the entry of both water and ions from the IC space. Hydrated regions inside  
919 the transporter are indicated in *gray shaded areas* with explicit water molecules displayed in  
920 spheres and lines (CPK format). Green and purple spheres are Na<sup>+</sup> migrating from the EC and  
921 IC side, respectively. **(C)** Structural alignment of hDAT R445C (*orange*) with hDAT WT (*white*). In  
922 hDAT R445C, the association between TM8 and TM9 (near the IC exposed region) is weakened.  
923 TM9 undergoes an outward tilting (*blue curved arrow*) to allow for the 'opening' of IC vestibule  
924 along TM8, facilitated by the absence of C445-E428 salt bridge (R445-E428 in hDAT WT holds  
925 TM8-TM9 in place). **(D-F)** Results from MD simulations of hDAT R445C. Time evolution of  
926 distances between Na<sup>+</sup> and D79 **(D)**; between salt-bridge forming residues at EC and IC regions  
927 **(E)** are displayed. On the EC side, D476-R85 distance decreases (EC gate closure). On the IC

928 side, D436-R60 distance increases (IC gate opening). D345-K66 remains closed. After  
929 dissociating from D436 ( $t = 150$  ns), R60 interacts with E428 ( $t = 200$  ns). (F) Interhelical distances  
930 for EC-exposed TM1b-TM10 and TM6a-TM10 shows that the EC region remains exposed to  
931 solvent with reduced opening, and IC-exposed TM1a-TM6b is closed, but there is a new opening  
932 indicated by the increase in TM6b-TM9 distance. Conformation shown in B is the last snapshot  
933 taken from the simulation trajectory in D-F.

### 934 **Figure 7. CQ enhances R445C expression ratios and flight coordination**

935 (A) Representative immunoblots of surface hDAT (top *left*), total hDAT (top *right*) and  
936 corresponding Na-K ATPase (bottom *left*) and actin (bottom *right*) loading controls. hDAT  
937 expression was normalized to hDAT WT. hDAT R445C displayed significantly reduced surface ( $p$   
938  $< 0.0001$ ;  $n = 4$ , in triplicate) and total glycosylated (#) expression relative to hDAT WT ( $p$   
939  $< 0.0001$ ;  $n = 4$ , in triplicate). (B) Average  $^3\text{H}$ ]DA saturation curves of DA uptake measured in hDAT  
940 WT (*black*) or hDAT R445C (*blue*) cells ( $n = 3$ , in triplicate). Curves were fit to Michaelis-Menten  
941 kinetics to derive  $K_m$  and  $V_{max}$ . DA uptake for hDAT R445C was significantly reduced compared  
942 with hDAT WT at every DA concentration measured ( $F_{(6,64)} = 52.4$ ,  $p < 0.0001$ ), as were the kinetic  
943 constants,  $K_m$  and  $V_{max}$  ( $p < 0.0001$ ). (C) Representative traces of amperometric currents (DA  
944 efflux) recorded in response to AMPH application (*left*;  $10 \mu\text{M}$ , indicated by arrow) from hDAT WT  
945 (*black*) and hDAT R445C (*blue*) cells loaded with DA ( $2 \text{ mM}$ ,  $10 \text{ min}$ ) with whole-cell pipette.  
946 Quantitation of peak current amplitudes illustrated a significant reduction in DA efflux recorded  
947 from hDAT R445C compare to hDAT WT (*right*;  $p = 0.008$ ;  $n = 6-7$ ). (D) Representative  
948 immunoblots of total hDAT (*top*) and actin loading controls (*bottom*), where glycosylated (#) and  
949 non-glycosylated (\*) hDAT is highlighted. Ratio of mature (glycosylated) to immature (non-  
950 glycosylated) DAT (mDAT/iDAT) expression following CQ treatment was normalized to vehicle  
951 condition for hDAT WT and hDAT R445C cells ( $n = 4$ , in duplicate). Incubating hDAT R445C cells  
952 with CQ ( $1 \text{ mM}$ ,  $4 \text{ h}$ ) significantly increased the ratio of mDAT/iDAT ( $F_{(1,20)} = 18.0$ ),  $p = 0.003$ ). CQ  
953 also significantly increased mDAT/iDAT expression in hDAT WT cells ( $p = 0.04$ ). (E) Diagramed

954 is the flight initiation assay used to determine take-off times for hDAT WT and hDAT R445C  
955 *Drosophila* (left). hDAT R445C and hDAT WT *Drosophila* were fed CQ (3 mM, 72 h) or vehicle  
956 supplemented diet. Quantitation showed a significant reduction in the time to initiate flight in hDAT  
957 R445C flies ( $F_{(1,29)} = 8.7$ ,  $p = 0.04$ ) in response to CQ compared with vehicle conditions (right).  
958 Time for flight initiation was comparable in hDAT WT flies exposed to CQ and vehicle  
959 supplemented diet ( $p > 0.05$ ). Data represent mean  $\pm$  SEM. Student's t-test (A) and (C); Two-way  
960 ANOVA with Bonferroni's multiple comparison test: (B), and (D-E).

961

## 962 REFERENCES

- 963 Achan, J., Talisuna, A.O., Erhart, A., Yeka, A., Tibenderana, J.K., Baliraine, F.N., Rosenthal, P.J.,  
964 and D'Alessandro, U. (2011). Quinine, an old anti-malarial drug in a modern world: role in the  
965 treatment of malaria. *Malar J* 10, 144.
- 966 Alford, R.F., Koehler Lemman, J., Weitzner, B.D., Duran, A.M., Tilley, D.C., Elazar, A., and Gray,  
967 J.J. (2015). An Integrated Framework Advancing Membrane Protein Modeling and Design. *PLoS*  
968 *computational biology* 11, e1004398.
- 969 Anderson, D.J., and Adolphs, R. (2014). A framework for studying emotions across species. *Cell*  
970 157, 187-200.
- 971 Aragao, D., Aishima, J., Cherukuvada, H., Clarken, R., Clift, M., Cowieson, N.P., Ericsson, D.J.,  
972 Gee, C.L., Macedo, S., Mudie, N., *et al.* (2018). MX2: a high-flux undulator microfocus beamline  
973 serving both the chemical and macromolecular crystallography communities at the Australian  
974 Synchrotron. *J Synchrotron Radiat* 25, 885-891.
- 975 Asjad, H.M.M., Kasture, A., El-Kasaby, A., Sackel, M., Hummel, T., Freissmuth, M., and Sucic, S.  
976 (2017). Pharmacochaperoning in a *Drosophila* model system rescues human dopamine  
977 transporter variants associated with infantile/juvenile parkinsonism. *The Journal of biological*  
978 *chemistry* 292, 19250-19265.

979 Aso, Y., Herb, A., Ogueta, M., Siwanowicz, I., Templier, T., Friedrich, A.B., Ito, K., Scholz, H., and  
980 Tanimoto, H. (2012). Three dopamine pathways induce aversive odor memories with different  
981 stability. *PLoS genetics* 8, e1002768.

982 Barlow, K.A., Ó Conchúir, S., Thompson, S., Suresh, P., Lucas, J.E., Heinonen, M., and  
983 Kortemme, T. (2018). Flex ddG: Rosetta Ensemble-Based Estimation of Changes in Protein–  
984 Protein Binding Affinity upon Mutation. *J Phys Chem B* 122, 5389-5399.

985 Barone, M.C., Sykiotis, G.P., and Bohmann, D. (2011). Genetic activation of Nrf2 signaling is  
986 sufficient to ameliorate neurodegenerative phenotypes in a *Drosophila* model of Parkinson's  
987 disease. *Dis Model Mech* 4, 701-707.

988 Beerepoot, P., Lam, V.M., and Salahpour, A. (2016). Pharmacological Chaperones of the  
989 Dopamine Transporter Rescue Dopamine Transporter Deficiency Syndrome Mutations in  
990 Heterologous Cells. *The Journal of biological chemistry* 291, 22053-22062.

991 Belovich, A.N., Aguilar, J.I., Mabry, S.J., Cheng, M.H., Zanella, D., Hamilton, P.J., Stanislawski,  
992 D.J., Shekar, A., Foster, J.D., Bahar, I., *et al.* (2019). A network of phosphatidylinositol (4,5)-  
993 bisphosphate (PIP2) binding sites on the dopamine transporter regulates amphetamine behavior  
994 in *Drosophila Melanogaster*. *Molecular psychiatry*.

995 Berry, J.A., Cervantes-Sandoval, I., Nicholas, E.P., and Davis, R.L. (2012). Dopamine is required  
996 for learning and forgetting in *Drosophila*. *Neuron* 74, 530-542.

997 Beuming, T., Shi, L., Javitch, J.A., and Weinstein, H. (2006). A comprehensive structure-based  
998 alignment of prokaryotic and eukaryotic neurotransmitter/Na<sup>+</sup> symporters (NSS) aids in the use  
999 of the LeuT structure to probe NSS structure and function. *Molecular pharmacology* 70, 1630-  
1000 1642.

1001 Bischof, J., Maeda, R.K., Hediger, M., Karch, F., and Basler, K. (2007). An optimized transgenesis  
1002 system for *Drosophila* using germ-line-specific phiC31 integrases. *Proc Natl Acad Sci U S A* 104,  
1003 3312-3317.



- 1004 Bjorklund, A., and Dunnett, S.B. (2007). Fifty years of dopamine research. Trends in  
1005 neurosciences 30, 185-187.
- 1006 Borre, L., Andreassen, T.F., Shi, L., Weinstein, H., and Gether, U. (2014). The second sodium  
1007 site in the dopamine transporter controls cation permeation and is regulated by chloride. The  
1008 Journal of biological chemistry 289, 25764-25773.
- 1009 Bowton, E., Saunders, C., Erreger, K., Sakrikar, D., Matthies, H.J., Sen, N., Jessen, T., Colbran,  
1010 R.J., Caron, M.G., Javitch, J.A., *et al.* (2010). Dysregulation of dopamine transporters via  
1011 dopamine D2 autoreceptors triggers anomalous dopamine efflux associated with attention-deficit  
1012 hyperactivity disorder. J Neurosci 30, 6048-6057.
- 1013 Bowton, E., Saunders, C., Reddy, I.A., Campbell, N.G., Hamilton, P.J., Henry, L.K., Coon, H.,  
1014 Sakrikar, D., Veenstra-VanderWeele, J.M., Blakely, R.D., *et al.* (2014). SLC6A3 coding variant  
1015 Ala559Val found in two autism probands alters dopamine transporter function and trafficking.  
1016 Translational psychiatry 4, e464.
- 1017 Brand, A.H., and Perrimon, N. (1993). Targeted gene expression as a means of altering cell fates  
1018 and generating dominant phenotypes. Development 118, 401-415.
- 1019 Cackovic, J., Gutierrez-Luke, S., Call, G.B., Juba, A., O'Brien, S., Jun, C.H., and Buhlman, L.M.  
1020 (2018). Vulnerable Parkin Loss-of-Function Drosophila Dopaminergic Neurons Have Advanced  
1021 Mitochondrial Aging, Mitochondrial Network Loss and Transiently Reduced Autophagosome  
1022 Recruitment. Front Cell Neurosci 12, 39.
- 1023 Campbell, N.G., Shekar, A., Aguilar, J.I., Peng, D., Navratna, V., Yang, D., Morley, A.N., Duran,  
1024 A.M., Galli, G., O'Grady, B., *et al.* (2019). Structural, functional, and behavioral insights of  
1025 dopamine dysfunction revealed by a deletion in SLC6A3. Proc Natl Acad Sci U S A 116, 3853-  
1026 3862.
- 1027 Card, G., and Dickinson, M. (2008). Performance trade-offs in the flight initiation of Drosophila.  
1028 The Journal of experimental biology 211, 341-353.

- 1029 Cartier, E., Garcia-Olivares, J., Janezic, E., Viana, J., Moore, M., Lin, M.L., Caplan, J.L., Torres,  
1030 G., and Kim, Y.H. (2019). The SUMO-Conjugase Ubc9 Prevents the Degradation of the  
1031 Dopamine Transporter, Enhancing Its Cell Surface Level and Dopamine Uptake. *Front Cell*  
1032 *Neurosci* *13*, 35.
- 1033 Cartier, E., Hamilton, P.J., Belovich, A.N., Shekar, A., Campbell, N.G., Saunders, C., Andreassen,  
1034 T.F., Gether, U., Veenstra-Vanderweele, J., Sutcliffe, J.S., *et al.* (2015). Rare autism-associated  
1035 variants implicate syntaxin 1 (STX1 R26Q) phosphorylation and the dopamine transporter (hDAT  
1036 R51W) in dopamine neurotransmission and behaviors. *EBioMedicine* *2*, 135-146.
- 1037 Chai, C., and Lim, K.L. (2013). Genetic insights into sporadic Parkinson's disease pathogenesis.  
1038 *Curr Genomics* *14*, 486-501.
- 1039 Chen, V.B., Arendall, W.B., 3rd, Headd, J.J., Keedy, D.A., Immormino, R.M., Kapral, G.J., Murray,  
1040 L.W., Richardson, J.S., and Richardson, D.C. (2010). MolProbity: all-atom structure validation for  
1041 macromolecular crystallography. *Acta Crystallogr D Biol Crystallogr* *66*, 12-21.
- 1042 Cheng, M.H., and Bahar, I. (2014). Complete mapping of substrate translocation highlights the  
1043 role of LeuT N-terminal segment in regulating transport cycle. *PLoS computational biology* *10*,  
1044 e1003879.
- 1045 Cheng, M.H., and Bahar, I. (2015). Molecular mechanism of dopamine transport by human  
1046 dopamine transporter. *Structure* *23*, 2171-2181.
- 1047 Cheng, M.H., and Bahar, I. (2019). Monoamine transporters: structure, intrinsic dynamics and  
1048 allosteric regulation. *Nat Struct Mol Biol* *26*, 545-556.
- 1049 Cheng, M.H., Kaya, C., and Bahar, I. (2018). Quantitative Assessment of the Energetics of  
1050 Dopamine Translocation by Human Dopamine Transporter. *J Phys Chem B* *122*, 5336-5346.
- 1051 Claridge-Chang, A., Roorda, R.D., Vrontou, E., Sjulson, L., Li, H., Hirsh, J., and Miesenbock, G.  
1052 (2009). Writing memories with light-addressable reinforcement circuitry. *Cell* *139*, 405-415.

1053 Claxton, D.P., Quick, M., Shi, L., de Carvalho, F.D., Weinstein, H., Javitch, J.A., and McHaourab,  
1054 H.S. (2010). Ion/substrate-dependent conformational dynamics of a bacterial homolog of  
1055 neurotransmitter:sodium symporters. *Nat Struct Mol Biol* 17, 822.

1056 Coleman, J.A., Yang, D., Zhao, Z., Wen, P.-C., Yoshioka, C., Tajkhorshid, E., and Gouaux, E.  
1057 (2019). Serotonin transporter–ibogaine complexes illuminate mechanisms of inhibition and  
1058 transport. *Nature* 569, 141.

1059 Daniels, G.M., and Amara, S.G. (1999). Regulated trafficking of the human dopamine transporter.  
1060 Clathrin-mediated internalization and lysosomal degradation in response to phorbol esters. *The*  
1061 *Journal of biological chemistry* 274, 35794-35801.

1062 DiCarlo, G.E., Aguilar, J.I., Matthies, H.J., Harrison, F.E., Bundschuh, K.E., West, A., Hashemi,  
1063 P., Herborg, F., Rickhag, M., Chen, H., *et al.* (2019). Autism-linked dopamine transporter mutation  
1064 alters striatal dopamine neurotransmission and dopamine-dependent behaviors. *J Clin Invest*  
1065 129, 3407-3419.

1066 Emsley, P., Lohkamp, B., Scott, W.G., and Cowtan, K. (2010). Features and development of Coot.  
1067 *Acta Crystallogr D Biol Crystallogr* 66, 486-501.

1068 Faivre, F., Joshi, A., Bezard, E., and Barrot, M. (2019). The hidden side of Parkinson's disease:  
1069 Studying pain, anxiety and depression in animal models. *Neuroscience and biobehavioral reviews*  
1070 96, 335-352.

1071 Feany, M.B., and Bender, W.W. (2000). A *Drosophila* model of Parkinson's disease. *Nature* 404,  
1072 394-398.

1073 Ford, C.P. (2014). The role of D2-autoreceptors in regulating dopamine neuron activity and  
1074 transmission. *Neuroscience* 282, 13-22.

1075 Forrest, L.R., Zhang, Y.W., Jacobs, M.T., Gesmonde, J., Xie, L., Honig, B.H., and Rudnick, G.  
1076 (2008). Mechanism for alternating access in neurotransmitter transporters. *Proc Natl Acad Sci U*  
1077 *S A* 105, 10338-10343.

- 1078 Friggi-Grelin, F., Coulom, H., Meller, M., Gomez, D., Hirsh, J., and Birman, S. (2003). Targeted  
1079 gene expression in *Drosophila* dopaminergic cells using regulatory sequences from tyrosine  
1080 hydroxylase. *J Neurobiol* *54*, 618-627.
- 1081 Giovannoni, G., O'Sullivan, J.D., Turner, K., Manson, A.J., and Lees, A.J. (2000). Hedonistic  
1082 homeostatic dysregulation in patients with Parkinson's disease on dopamine replacement  
1083 therapies. *J Neurol Neurosurg Psychiatry* *68*, 423-428.
- 1084 Giros, B., and Caron, M.G. (1993). Molecular characterization of the dopamine transporter.  
1085 *Trends in pharmacological sciences* *14*, 43-49.
- 1086 Hamilton, P.J., Belovich, A.N., Khelashvili, G., Saunders, C., Erreger, K., Javitch, J.A., Sitte, H.H.,  
1087 Weinstein, H., Matthies, H.J.G., and Galli, A. (2014). PIP2 regulates psychostimulant behaviors  
1088 through its interaction with a membrane protein. *Nat Chem Biol* *10*, 582-589.
- 1089 Hamilton, P.J., Campbell, N.G., Sharma, S., Erreger, K., Herborg Hansen, F., Saunders, C.,  
1090 Belovich, A.N., Consortium, N.A.A.S., Sahai, M.A., Cook, E.H., *et al.* (2013). De novo mutation in  
1091 the dopamine transporter gene associates dopamine dysfunction with autism spectrum disorder.  
1092 *Molecular psychiatry* *18*, 1315-1323.
- 1093 Hansen, F.H., Skjorringe, T., Yasmeen, S., Arends, N.V., Sahai, M.A., Erreger, K., Andreassen,  
1094 T.F., Holy, M., Hamilton, P.J., Neergheen, V., *et al.* (2014). Missense dopamine transporter  
1095 mutations associate with adult parkinsonism and ADHD. *J Clin Invest* *124*, 3107-3120.
- 1096 Hartenstein, V., and Stollewerk, A. (2015). The evolution of early neurogenesis. *Dev Cell* *32*, 390-  
1097 407.
- 1098 Hastrup, H., Sen, N., and Javitch, J.A. (2003). The human dopamine transporter forms a tetramer  
1099 in the plasma membrane: cross-linking of a cysteine in the fourth transmembrane segment is  
1100 sensitive to cocaine analogs. *The Journal of biological chemistry* *278*, 45045-45048.
- 1101 Humphrey, W., Dalke, A., and Schulten, K. (1996). VMD: visual molecular dynamics. *Journal of*  
1102 *molecular graphics* *14*, 33-38, 27-38.

1103 Ingram, S.L., Prasad, B.M., and Amara, S.G. (2002). Dopamine transporter-mediated  
1104 conductances increase excitability of midbrain dopamine neurons. *Nat Neurosci* 5, 971-978.

1105 Jenner, P. (2015). Treatment of the later stages of Parkinson's disease - pharmacological  
1106 approaches now and in the future. *Transl Neurodegener* 4, 3.

1107 Jeschke, G., Koch, A., Jonas, U., and Godt, A. (2002). Direct conversion of EPR dipolar time  
1108 evolution data to distance distributions. *Journal of magnetic resonance* 155, 72-82.

1109 Jeschke, G., and Polyhach, Y. (2007). Distance measurements on spin-labelled  
1110 biomacromolecules by pulsed electron paramagnetic resonance. *Physical chemistry chemical  
1111 physics : PCCP* 9, 1895-1910.

1112 Jones, S.R., Gainetdinov, R.R., Hu, X.T., Cooper, D.C., Wightman, R.M., White, F.J., and Caron,  
1113 M.G. (1999). Loss of autoreceptor functions in mice lacking the dopamine transporter. *Nat  
1114 Neurosci* 2, 649-655.

1115 Kabsch, W. (2010). Xds. *Acta Crystallogr D Biol Crystallogr* 66, 125-132.

1116 Kahlig, K.M., Binda, F., Khoshbouei, H., Blakely, R.D., McMahon, D.G., Javitch, J.A., and Galli,  
1117 A. (2005). Amphetamine induces dopamine efflux through a dopamine transporter channel. *Proc  
1118 Natl Acad Sci U S A* 102, 3495-3500.

1119 Kaiser, M. (2015). Neuroanatomy: connectome connects fly and mammalian brain networks. *Curr  
1120 Biol* 25, R416-418.

1121 Kazmier, K., Sharma, S., Quick, M., Islam, S.M., Roux, B., Weinstein, H., Javitch, J.A., and  
1122 McHaourab, H.S. (2014). Conformational dynamics of ligand-dependent alternating access in  
1123 LeuT. *Nat Struct Mol Biol* 21, 472-479.

1124 Khelashvili, G., Doktorova, M., Sahai, M.A., Johner, N., Shi, L., and Weinstein, H. (2015a).  
1125 Computational modeling of the N-terminus of the human dopamine transporter and its interaction  
1126 with PIP2 -containing membranes. *Proteins* 83, 952-969.

- 1127 Khelashvili, G., Stanley, N., Sahai, M.A., Medina, J., LeVine, M.V., Shi, L., De Fabritiis, G., and  
1128 Weinstein, H. (2015b). Spontaneous inward opening of the dopamine transporter is triggered by  
1129 PIP2-regulated dynamics of the N-terminus. *ACS Chem Neurosci* **6**, 1825-1837.
- 1130 Kirkhart, C., and Scott, K. (2015). Gustatory learning and processing in the *Drosophila* mushroom  
1131 bodies. *J Neurosci* **35**, 5950-5958.
- 1132 Kniazeff, J., Shi, L., Loland, C.J., Javitch, J.A., Weinstein, H., and Gether, U. (2008). An  
1133 intracellular interaction network regulates conformational transitions in the dopamine transporter.  
1134 *The Journal of biological chemistry* **283**, 17691-17701.
- 1135 Krishnamurthy, H., and Gouaux, E. (2012). X-ray structures of LeuT in substrate-free outward-  
1136 open and apo inward-open states. *Nature* **481**, 469-474.
- 1137 Kuenze, G., Duran, A.M., Woods, H., Brewer, K.R., McDonald, E.F., Vanoye, C.G., George, A.L.,  
1138 Jr., Sanders, C.R., and Meiler, J. (2019). Upgraded molecular models of the human KCNQ1  
1139 potassium channel. *PloS one* **14**, e0220415.
- 1140 Kume, K., Kume, S., Park, S.K., Hirsh, J., and Jackson, F.R. (2005). Dopamine is a regulator of  
1141 arousal in the fruit fly. *J Neurosci* **25**, 7377-7384.
- 1142 Kurian, M.A., Li, Y., Zhen, J., Meyer, E., Hai, N., Christen, H.J., Hoffmann, G.F., Jardine, P., von  
1143 Moers, A., Mordekar, S.R., *et al.* (2011). Clinical and molecular characterisation of hereditary  
1144 dopamine transporter deficiency syndrome: an observational cohort and experimental study.  
1145 *Lancet Neurol* **10**, 54-62.
- 1146 Kurian, M.A., Zhen, J., Cheng, S.Y., Li, Y., Mordekar, S.R., Jardine, P., Morgan, N.V., Meyer, E.,  
1147 Tee, L., Pasha, S., *et al.* (2009). Homozygous loss-of-function mutations in the gene encoding  
1148 the dopamine transporter are associated with infantile parkinsonism-dystonia. *J Clin Invest* **119**,  
1149 1595-1603.
- 1150 Lill, C.M. (2016). Genetics of Parkinson's disease. *Mol Cell Probes* **30**, 386-396.

1151 Loder, M.K., and Melikian, H.E. (2003). The dopamine transporter constitutively internalizes and  
1152 recycles in a protein kinase C-regulated manner in stably transfected PC12 cell lines. *The Journal*  
1153 *of biological chemistry* *278*, 22168-22174.

1154 Mazei-Robison, M.S., Bowton, E., Holy, M., Schmudermaier, M., Freissmuth, M., Sitte, H.H., Galli,  
1155 A., and Blakely, R.D. (2008). Anomalous dopamine release associated with a human dopamine  
1156 transporter coding variant. *J Neurosci* *28*, 7040-7046.

1157 McClung, C., and Hirsh, J. (1998). Stereotypic behavioral responses to free-base cocaine and  
1158 the development of behavioral sensitization in *Drosophila*. *Curr Biol* *8*, 109-112.

1159 McCoy, A.J., Grosse-Kunstleve, R.W., Adams, P.D., Winn, M.D., Storoni, L.C., and Read, R.J.  
1160 (2007). Phaser crystallographic software. *J Appl Crystallogr* *40*, 658-674.

1161 McGregor, M.M., and Nelson, A.B. (2019). Circuit Mechanisms of Parkinson's Disease. *Neuron*  
1162 *101*, 1042-1056.

1163 McHaourab, H.S., Steed, P.R., and Kazmier, K. (2011). Toward the fourth dimension of  
1164 membrane protein structure: insight into dynamics from spin-labeling EPR spectroscopy.  
1165 *Structure* *19*, 1549-1561.

1166 Meisenzahl, E.M., Schmitt, G.J., Scheuerecker, J., and Moller, H.J. (2007). The role of dopamine  
1167 for the pathophysiology of schizophrenia. *Int Rev Psychiatry* *19*, 337-345.

1168 Miranda, M., Dionne, K.R., Sorkina, T., and Sorkin, A. (2007). Three ubiquitin conjugation sites in  
1169 the amino terminus of the dopamine transporter mediate protein kinase C-dependent endocytosis  
1170 of the transporter. *Mol Biol Cell* *18*, 313-323.

1171 Mou, L., Ding, W., and Fernandez-Funez, P. (2019). Open questions on the nature of Parkinson's  
1172 disease: from triggers to spreading pathology. *J Med Genet* *57*, 73-81.

1173 Murshudov, G.N., Skubak, P., Lebedev, A.A., Pannu, N.S., Steiner, R.A., Nicholls, R.A., Winn,  
1174 M.D., Long, F., and Vagin, A.A. (2011). REFMAC5 for the refinement of macromolecular crystal  
1175 structures. *Acta Crystallogr D Biol Crystallogr* *67*, 355-367.

1176 Nagoshi, E. (2018). *Drosophila* Models of Sporadic Parkinson's Disease. *Int J Mol Sci* *19*.

1177 Ng, J., Zhen, J., Meyer, E., Erreger, K., Li, Y., Kakar, N., Ahmad, J., Thiele, H., Kubisch, C., Rider,  
1178 N.L., *et al.* (2014). Dopamine transporter deficiency syndrome: phenotypic spectrum from infancy  
1179 to adulthood. *Brain* *137*, 1107-1119.

1180 Palmiter, R.D. (2008). Dopamine signaling in the dorsal striatum is essential for motivated  
1181 behaviors: lessons from dopamine-deficient mice. *Ann N Y Acad Sci* *1129*, 35-46.

1182 Panigrahi, B., Martin, K.A., Li, Y., Graves, A.R., Vollmer, A., Olson, L., Mensh, B.D., Karpova,  
1183 A.Y., and Dudman, J.T. (2015). Dopamine Is Required for the Neural Representation and Control  
1184 of Movement Vigor. *Cell* *162*, 1418-1430.

1185 Penmatsa, A., Wang, K.H., and Gouaux, E. (2013). X-ray structure of dopamine transporter  
1186 elucidates antidepressant mechanism. *Nature* *503*, 85-90.

1187 Pettersen, E.F., Goddard, T.D., Huang, C.C., Couch, G.S., Greenblatt, D.M., Meng, E.C., and  
1188 Ferrin, T.E. (2004). UCSF Chimera--a visualization system for exploratory research and analysis.  
1189 *Journal of computational chemistry* *25*, 1605-1612.

1190 Phillips, J.C., Braun, R., Wang, W., Gumbart, J., Tajkhorshid, E., Villa, E., Chipot, C., Skeel, R.D.,  
1191 Kale, L., and Schulten, K. (2005). Scalable molecular dynamics with NAMD. *Journal of*  
1192 *computational chemistry* *26*, 1781-1802.

1193 Pitmon, E., Stephens, G., Parkhurst, S.J., Wolf, F.W., Kehne, G., Taylor, M., and Lebestky, T.  
1194 (2016). The D1 family dopamine receptor, DopR, potentiates hind leg grooming behavior in  
1195 *Drosophila*. *Genes, brain, and behavior* *15*, 327-334.

1196 Pizzo, A.B., Karam, C.S., Zhang, Y., Ma, C.L., McCabe, B.D., and Javitch, J.A. (2014).  
1197 Amphetamine-induced behavior requires CaMKII-dependent dopamine transporter  
1198 phosphorylation. *Molecular psychiatry* *19*, 279-281.

1199 Politis, M., and Niccolini, F. (2015). Serotonin in Parkinson's disease. *Behav Brain Res* *277*, 136-  
1200 145.

1201 Razavi, A.M., Khelashvili, G., and Weinstein, H. (2018). How structural elements evolving from  
1202 bacterial to human SLC6 transporters enabled new functional properties. *BMC Biol* *16*, 31.



1203 Reith, M.E.A., Jones, K.T., Zhen, J., and Topiol, S. (2018). Latch and trigger role for R445 in DAT  
1204 transport explains molecular basis of DTDS. *Bioorg Med Chem Lett* 28, 470-475.

1205 Riemensperger, T., Isabel, G., Coulom, H., Neuser, K., Seugnet, L., Kume, K., Iche-Torres, M.,  
1206 Cassar, M., Strauss, R., Preat, T., *et al.* (2011). Behavioral consequences of dopamine deficiency  
1207 in the *Drosophila* central nervous system. *Proc Natl Acad Sci U S A* 108, 834-839.

1208 Robertson, S.D., Matthies, H.J., and Galli, A. (2009). A closer look at amphetamine-induced  
1209 reverse transport and trafficking of the dopamine and norepinephrine transporters. *Mol Neurobiol*  
1210 39, 73-80.

1211 Russo, S.J., and Nestler, E.J. (2013). The brain reward circuitry in mood disorders. *Nat Rev*  
1212 *Neurosci* 14, 609-625.

1213 Sadaf, S., Reddy, O.V., Sane, S.P., and Hasan, G. (2015). Neural control of wing coordination in  
1214 flies. *Curr Biol* 25, 80-86.

1215 Salvatore, M.F., Calipari, E.S., and Jones, S.R. (2016). Regulation of Tyrosine Hydroxylase  
1216 Expression and Phosphorylation in Dopamine Transporter-Deficient Mice. *ACS Chem Neurosci*  
1217 7, 941-951.

1218 Shan, J., Javitch, J.A., Shi, L., and Weinstein, H. (2011). The substrate-driven transition to an  
1219 inward-facing conformation in the functional mechanism of the dopamine transporter. *PloS one*  
1220 6, e16350.

1221 Shekar, A., Aguilar, J.I., Galli, G., Cozzi, N.V., Brandt, S.D., Ruoho, A.E., Baumann, M.H.,  
1222 Matthies, H.J., and Galli, A. (2017). Atypical dopamine efflux caused by 3,4-  
1223 methylenedioxypyrovalerone (MDPV) via the human dopamine transporter. *J Chem Neuroanat*  
1224 83-84, 69-74.

1225 Stolzenberg, S., Quick, M., Zhao, C., Gotfryd, K., Khelashvili, G., Gether, U., Loland, C.J., Javitch,  
1226 J.A., Noskov, S., Weinstein, H., *et al.* (2015). Mechanism of the Association between Na<sup>+</sup> Binding  
1227 and Conformations at the Intracellular Gate in Neurotransmitter:Sodium Symporters. *The Journal*  
1228 *of biological chemistry* 290, 13992-14003.

- 1229 Swanson, J.M., Kinsbourne, M., Nigg, J., Lanphear, B., Stefanatos, G.A., Volkow, N., Taylor, E.,  
1230 Casey, B.J., Castellanos, F.X., and Wadhwa, P.D. (2007). Etiologic subtypes of attention-  
1231 deficit/hyperactivity disorder: brain imaging, molecular genetic and environmental factors and the  
1232 dopamine hypothesis. *Neuropsychol Rev* 17, 39-59.
- 1233 Taylor, T.N., Greene, J.G., and Miller, G.W. (2010). Behavioral phenotyping of mouse models of  
1234 Parkinson's disease. *Behav Brain Res* 211, 1-10.
- 1235 Trinh, J., and Farrer, M. (2013). Advances in the genetics of Parkinson disease. *Nat Rev Neurol*  
1236 9, 445-454.
- 1237 Trinh, K., Moore, K., Wes, P.D., Muchowski, P.J., Dey, J., Andrews, L., and Pallanck, L.J. (2008).  
1238 Induction of the phase II detoxification pathway suppresses neuron loss in *Drosophila* models of  
1239 Parkinson's disease. *J Neurosci* 28, 465-472.
- 1240 Turner, R.S., and Desmurget, M. (2010). Basal ganglia contributions to motor control: a vigorous  
1241 tutor. *Curr Opin Neurobiol* 20, 704-716.
- 1242 van den Berg, C., Beek, P.J., Wagenaar, R.C., and van Wieringen, P.C. (2000). Coordination  
1243 disorders in patients with Parkinson's disease: a study of paced rhythmic forearm movements.  
1244 *Exp Brain Res* 134, 174-186.
- 1245 Wang, J.W., Beck, E.S., and McCabe, B.D. (2012). A modular toolset for recombination  
1246 transgenesis and neurogenetic analysis of *Drosophila*. *PloS one* 7, e42102.
- 1247 Wang, K.H., Penmatsa, A., and Gouaux, E. (2015). Neurotransmitter and psychostimulant  
1248 recognition by the dopamine transporter. *Nature* 521, 322-327.
- 1249 Weintraub, D., Koester, J., Potenza, M.N., Siderowf, A.D., Stacy, M., Voon, V., Whetteckey, J.,  
1250 Wunderlich, G.R., and Lang, A.E. (2010). Impulse control disorders in Parkinson disease: a cross-  
1251 sectional study of 3090 patients. *Arch Neurol* 67, 589-595.
- 1252 Weyerhauser, P., Kantelhardt, S.R., and Kim, E.L. (2018). Re-purposing Chloroquine for  
1253 Glioblastoma: Potential Merits and Confounding Variables. *Front Oncol* 8, 335.

1254 Whitworth, A.J., Theodore, D.A., Greene, J.C., Benes, H., Wes, P.D., and Pallanck, L.J. (2005).  
1255 Increased glutathione S-transferase activity rescues dopaminergic neuron loss in a *Drosophila*  
1256 model of Parkinson's disease. *Proc Natl Acad Sci U S A* *102*, 8024-8029.

1257 Winn, M.D., Isupov, M.N., and Murshudov, G.N. (2001). Use of TLS parameters to model  
1258 anisotropic displacements in macromolecular refinement. *Acta Crystallogr D Biol Crystallogr* *57*,  
1259 122-133.

1260 Wu, E.L., Cheng, X., Jo, S., Rui, H., Song, K.C., Dávila-Contreras, E.M., Qi, Y., Lee, J., Monje-  
1261 Galvan, V., and Venable, R.M. (2014). CHARMM-GUI membrane builder toward realistic  
1262 biological membrane simulations. *Journal of computational chemistry* *35*, 1997-2004.

1263 Wu, S., Bellve, K.D., Fogarty, K.E., and Melikian, H.E. (2015). Ack1 is a dopamine transporter  
1264 endocytic brake that rescues a trafficking-dysregulated ADHD coding variant. *Proc Natl Acad Sci*  
1265 *U S A* *112*, 15480-15485.

1266 Xiong, Y., and Yu, J. (2018). Modeling Parkinson's Disease in *Drosophila*: What Have We  
1267 Learned for Dominant Traits? *Front Neurol* *9*, 228.

1268 Yamamoto, S., and Seto, E.S. (2014). Dopamine dynamics and signaling in *Drosophila*: an  
1269 overview of genes, drugs and behavioral paradigms. *Experimental animals* *63*, 107-119.

1270 Yamashita, A., Singh, S.K., Kawate, T., Jin, Y., and Gouaux, E. (2005). Crystal structure of a  
1271 bacterial homologue of Na<sup>+</sup>/Cl<sup>-</sup>-dependent neurotransmitter transporters. *Nature* *437*, 215-223.

1272 Zabalax, F.A., Card, G.M., Fontaine, E.I., Murray, R.M., and Dickinson, M.H. (2008). Dynamics  
1273 of escaping flight initiations of *Drosophila melanogaster*. Paper presented at: 2008 2nd IEEE RAS  
1274 & EMBS International Conference on Biomedical Robotics and Biomechatronics.

1275 Zou, P., and McHaourab, H.S. (2010). Increased sensitivity and extended range of distance  
1276 measurements in spin-labeled membrane proteins: Q-band double electron-electron resonance  
1277 and nanoscale bilayers. *Biophysical journal* *98*, L18-20.

1278

## Figure 1

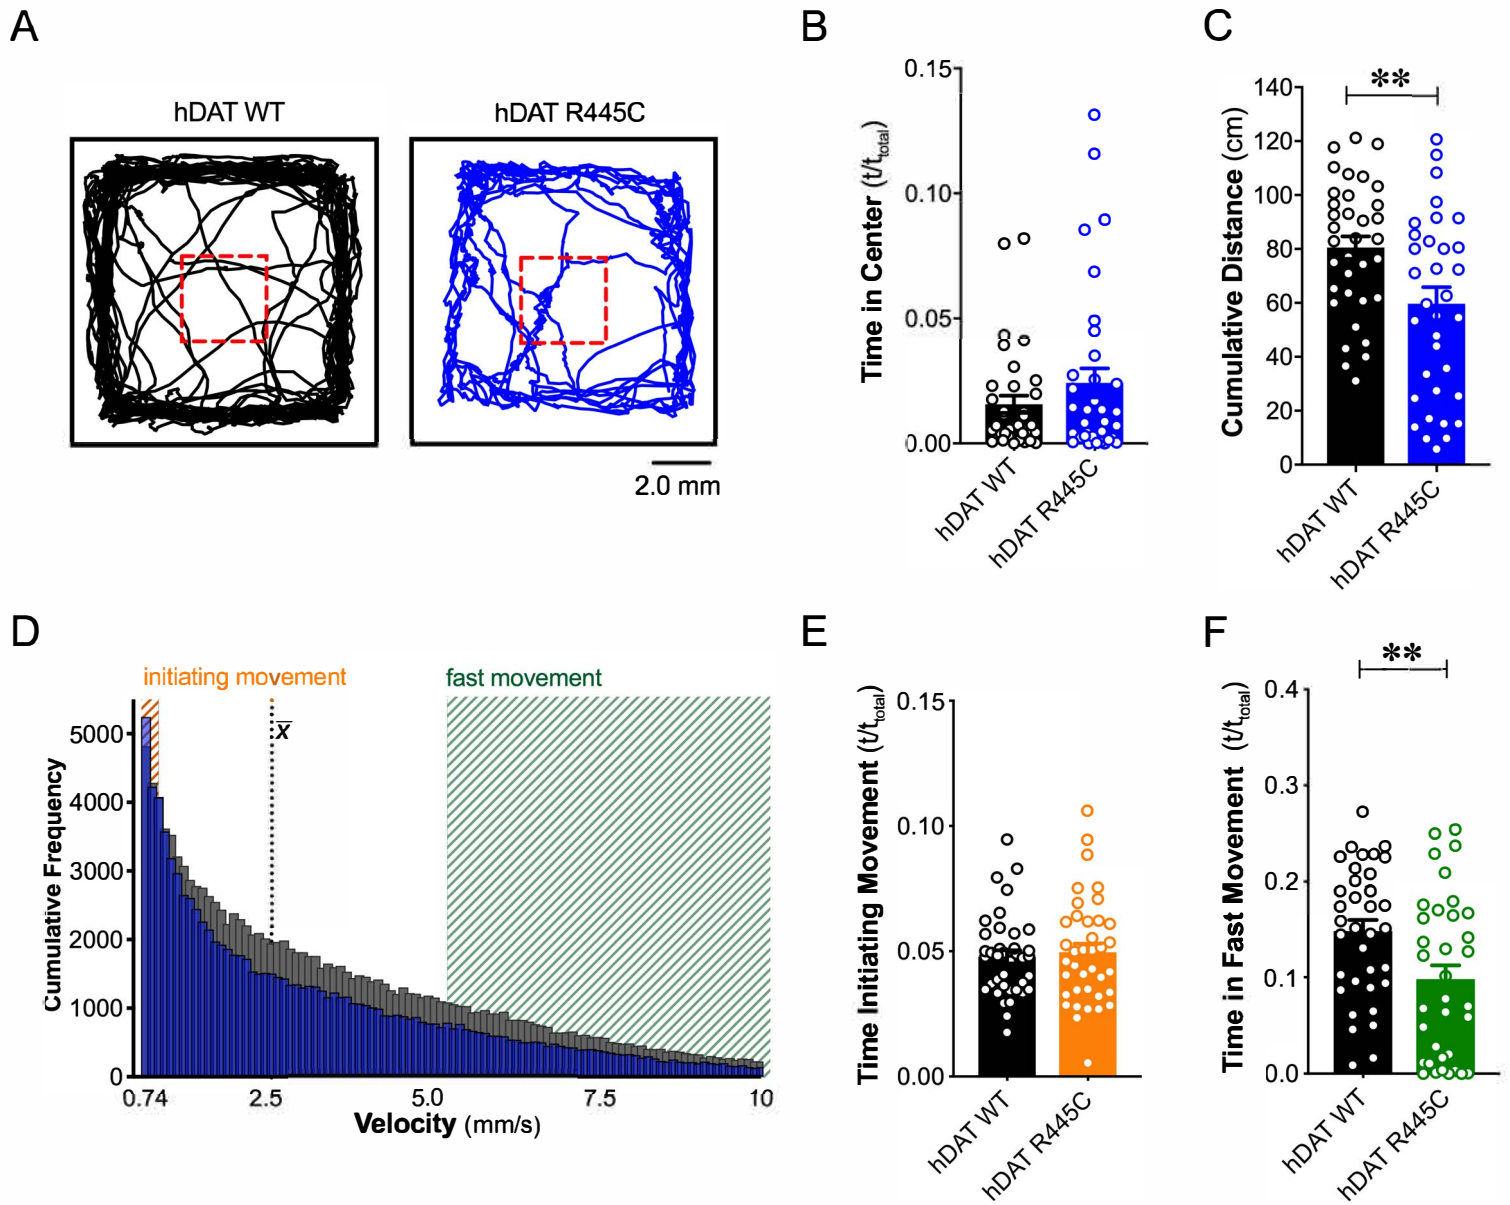

## Figure 2

A

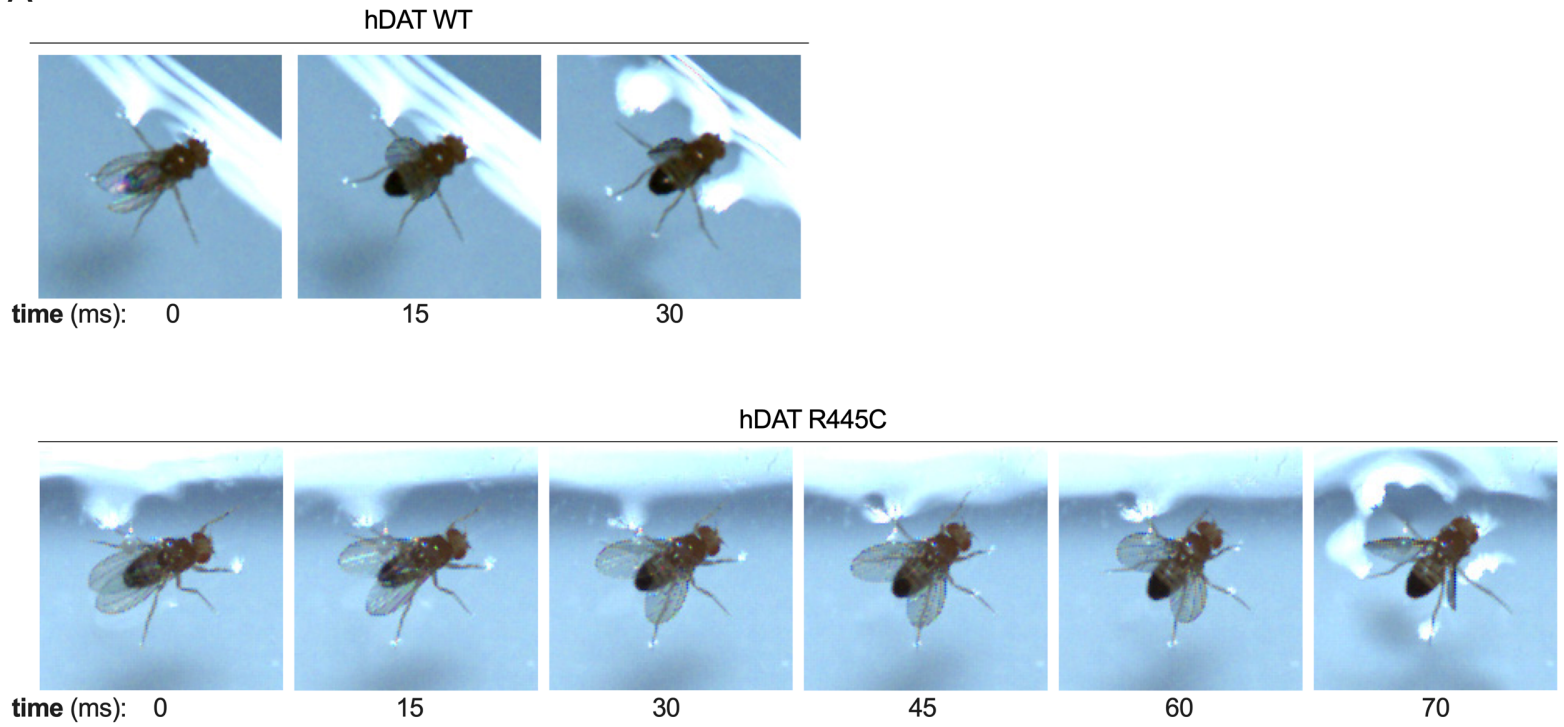

B

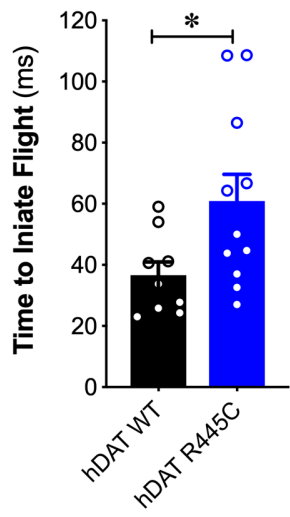

C

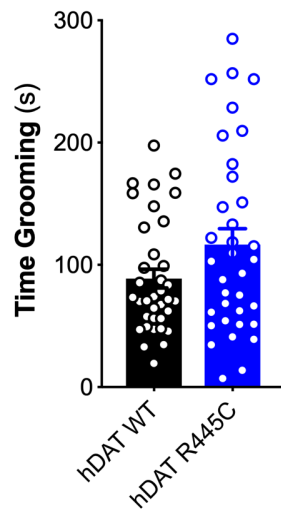

## Figure 3

A

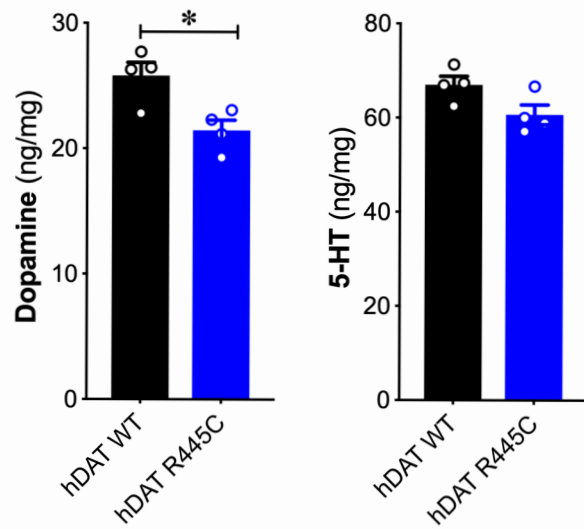

B

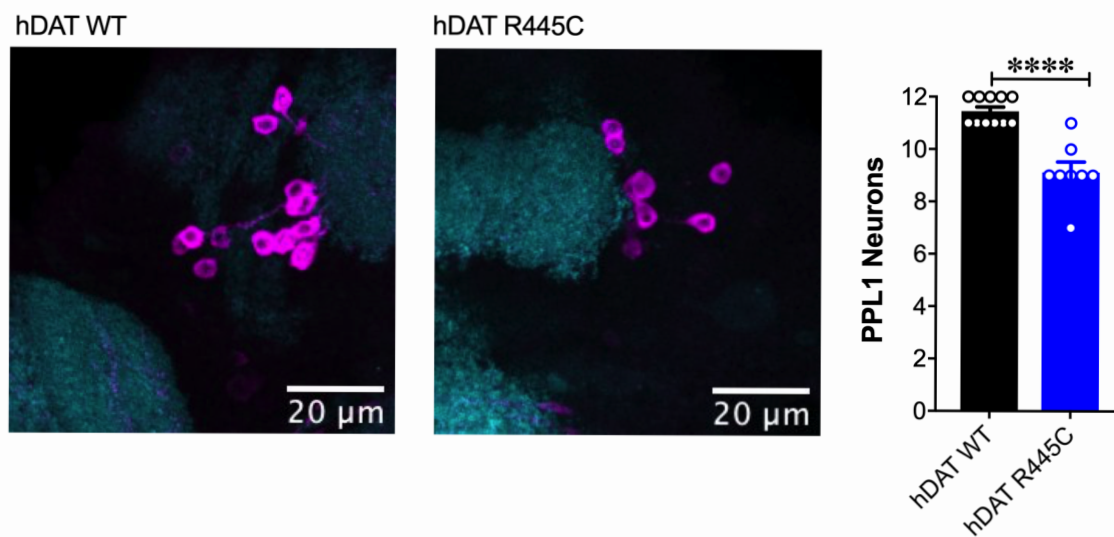

C

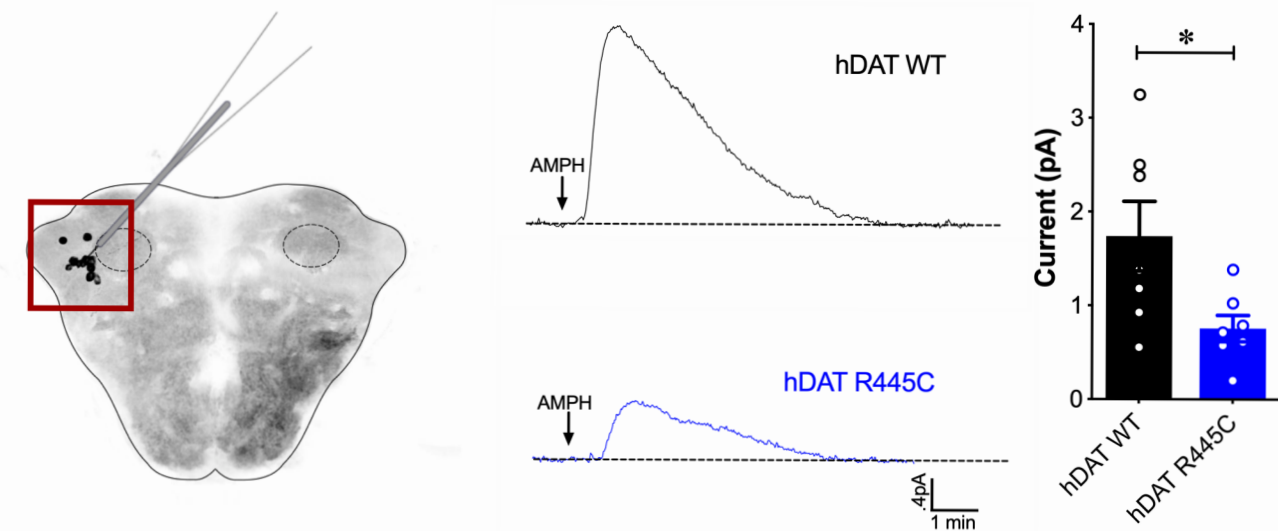

## Figure 4

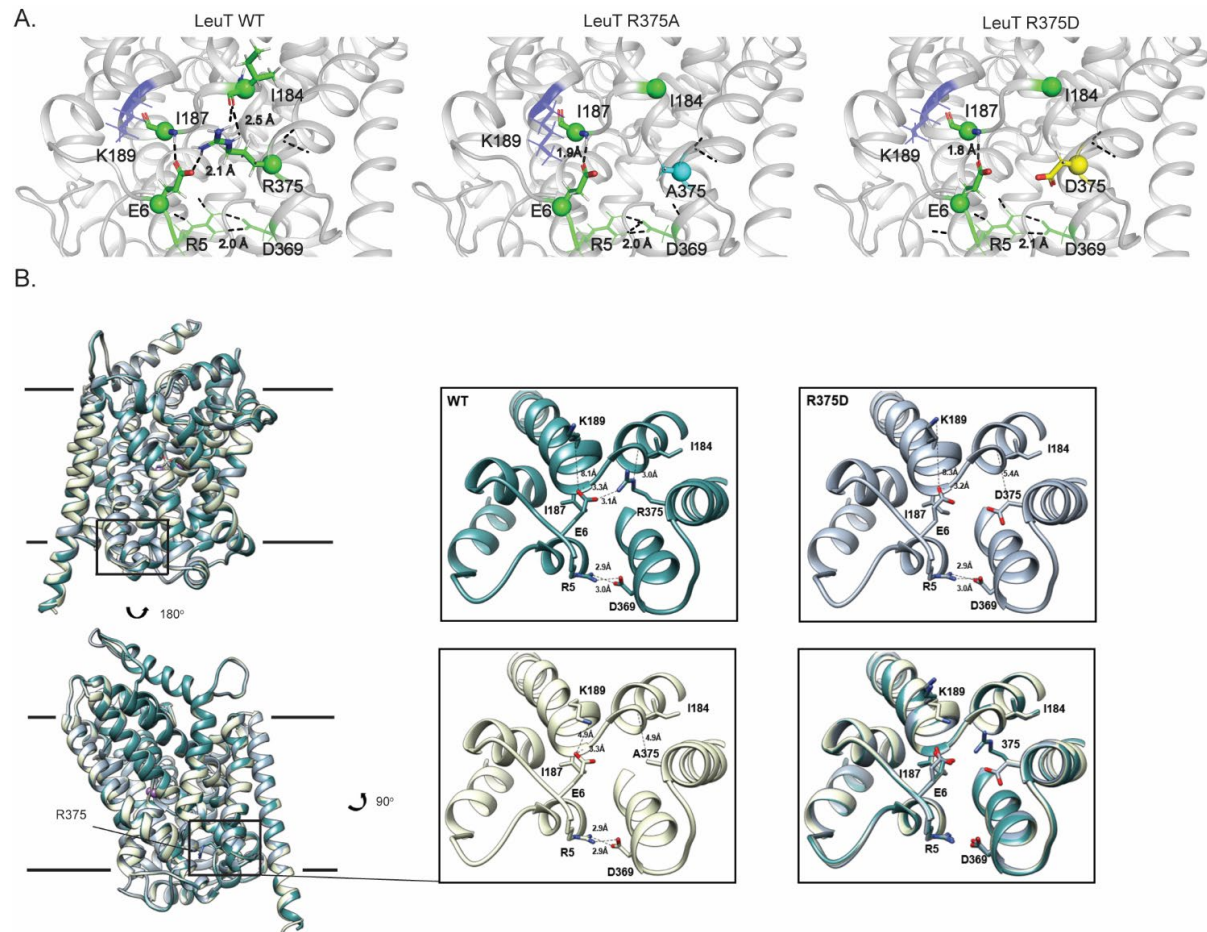

# Figure 5

**A**

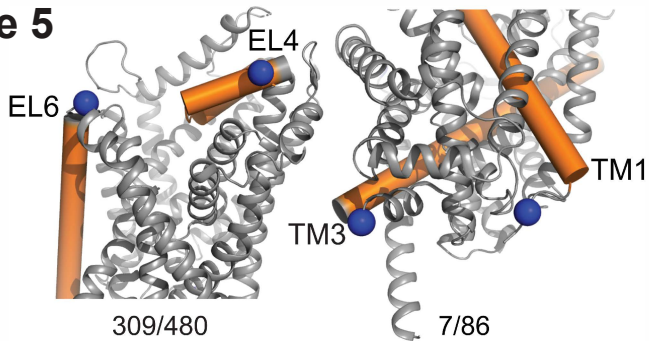

**B**

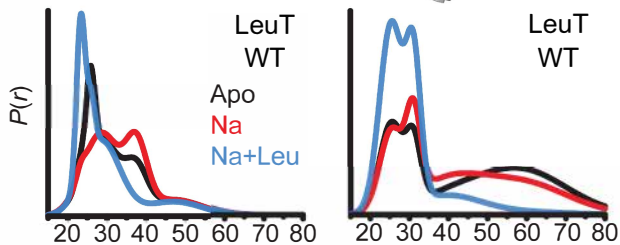

**C**

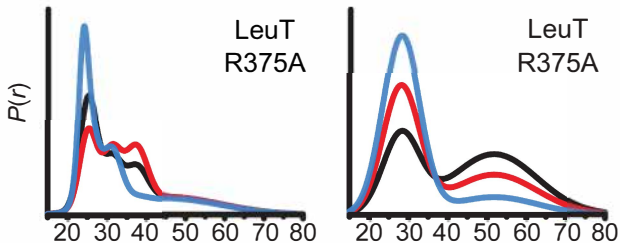

**D**

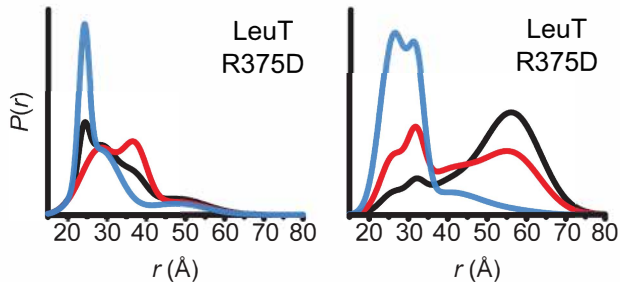



## Figure 6

A

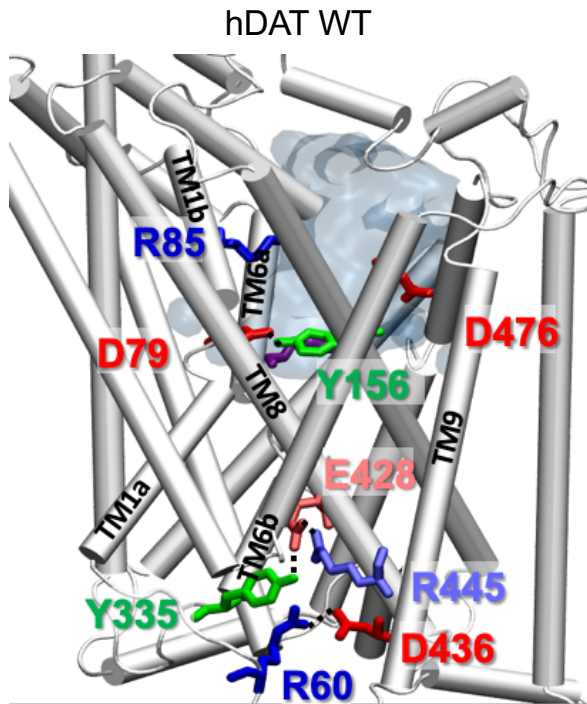

B

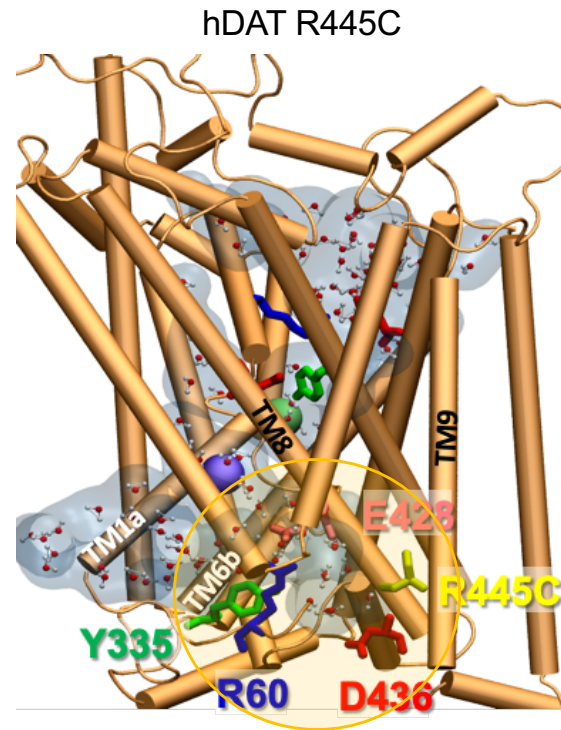

C

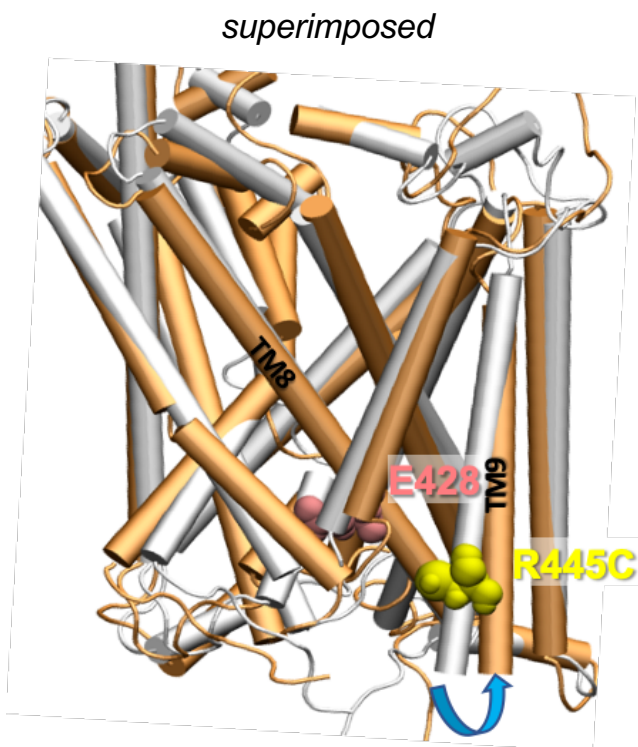

D

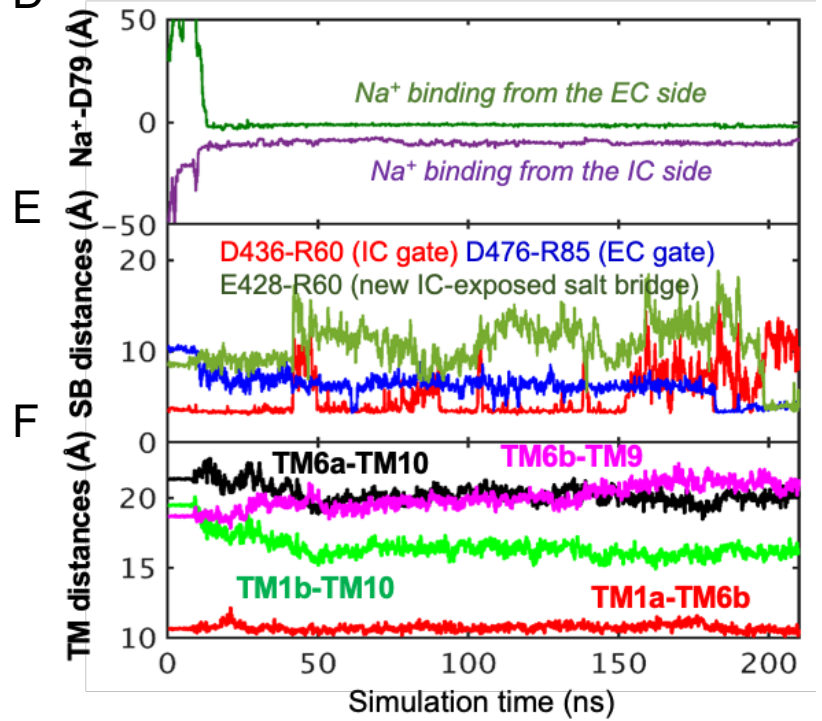

## Figure 7

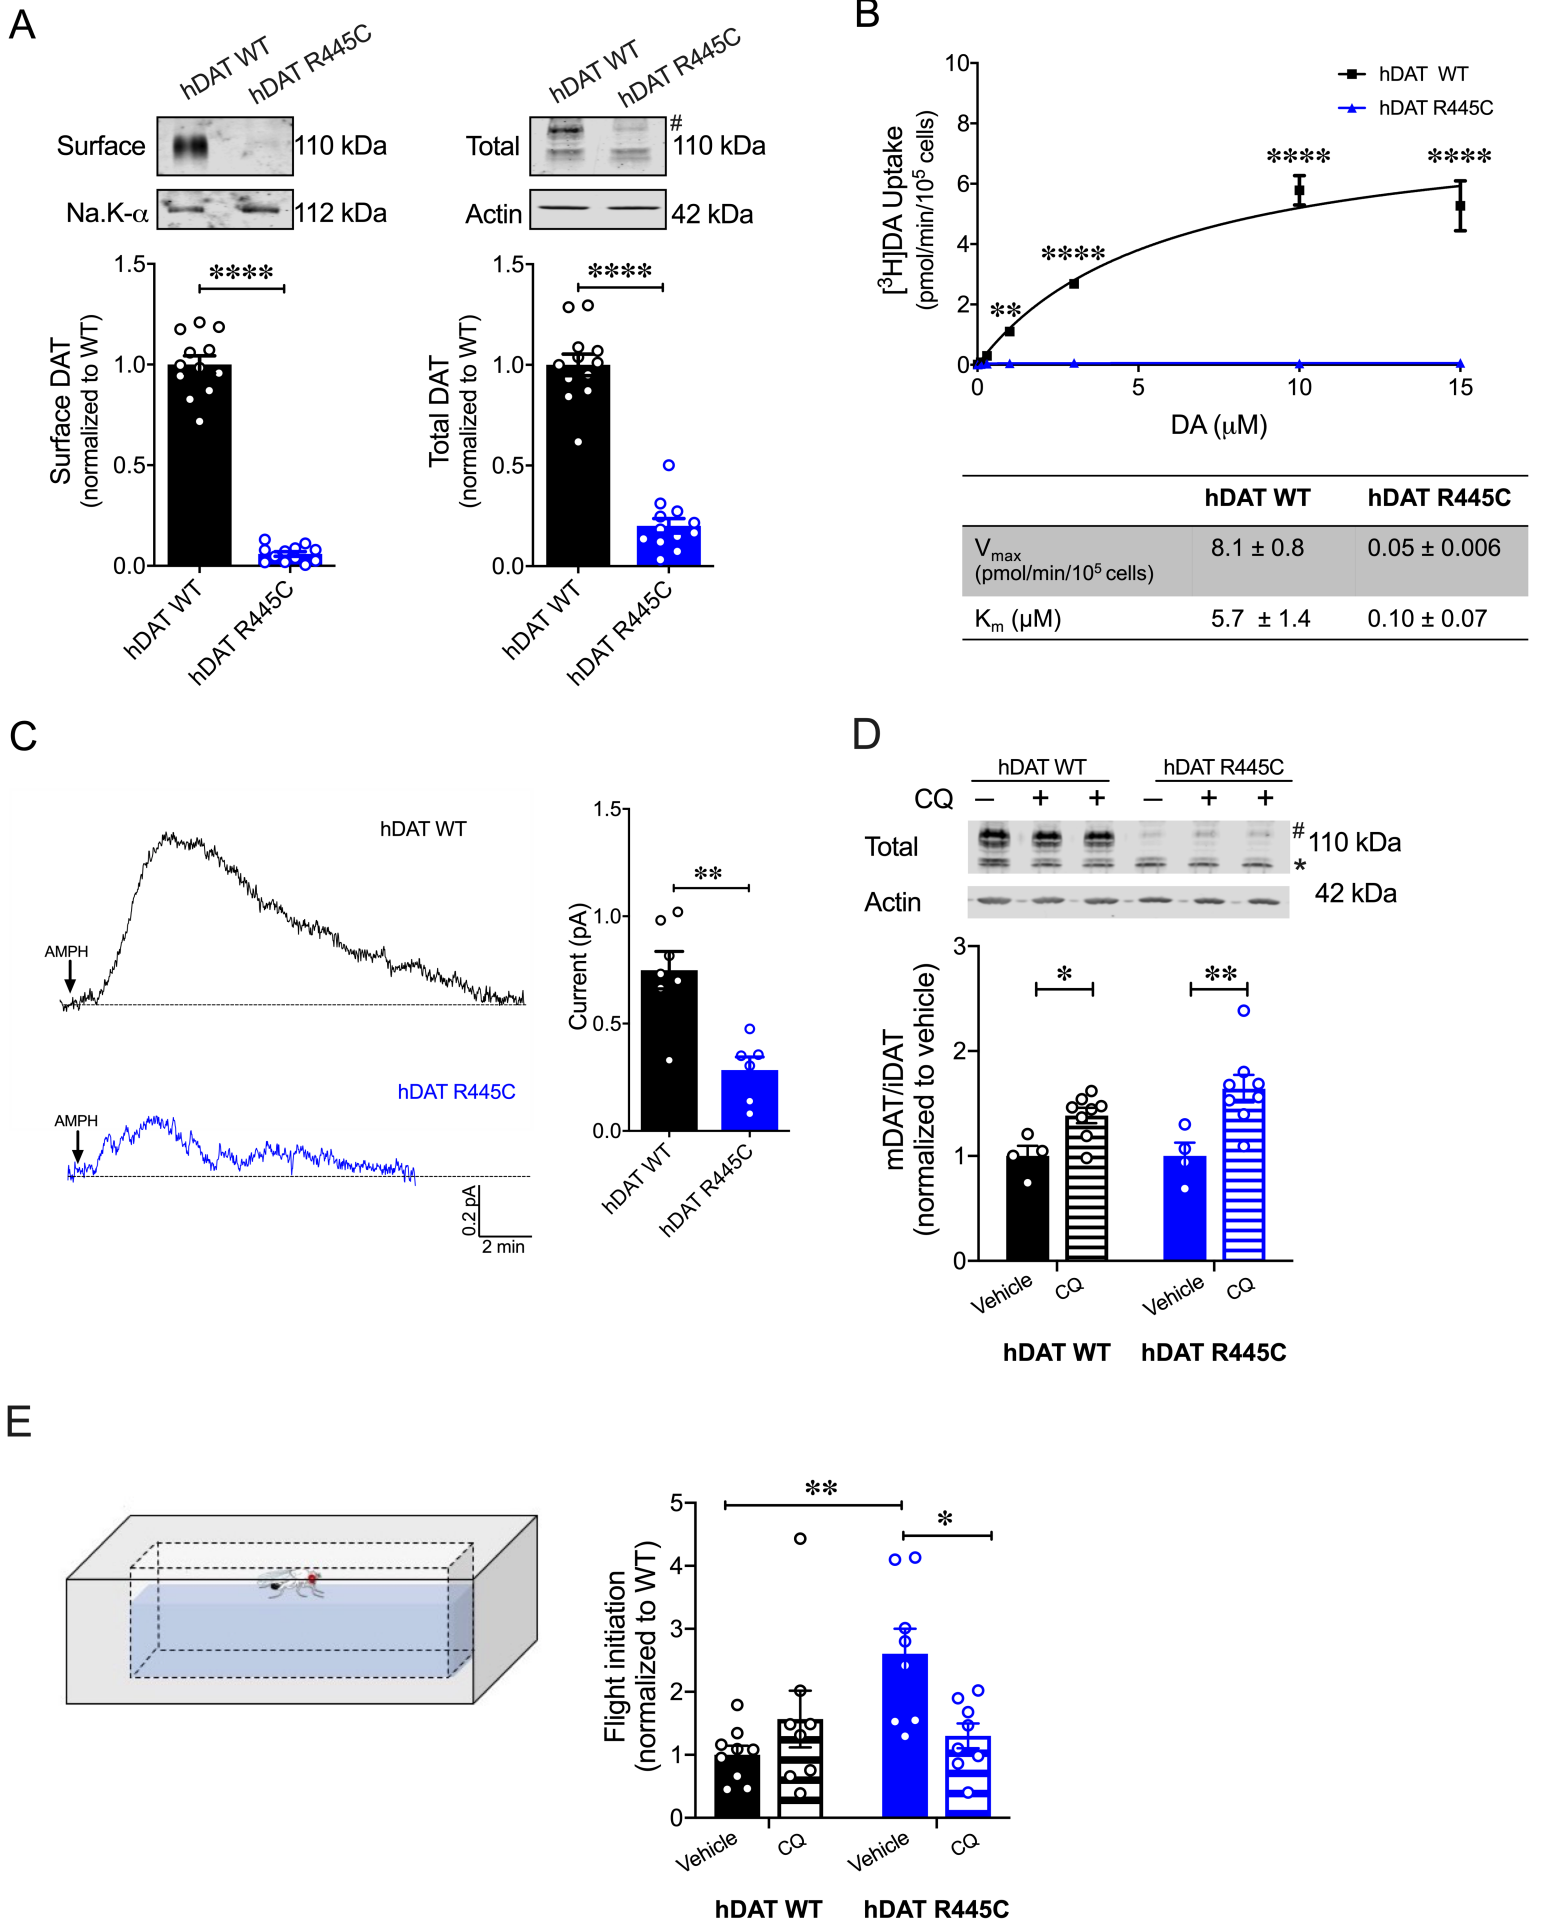

### Supplementary Figure 1: AMPH-induced DA efflux and behaviors in hDAT WT flies.

(A) (*top*) AMPH-induced (arrow) amperometric currents in DAT<sup>fmn</sup>, dDAT, and hDAT WT brains. In hDAT WT brains, cocaine (20  $\mu$ M) blocked the ability of AMPH to cause DA efflux. (*bottom*) Quantitation of peak currents showed a significant decrease in DA efflux measured in DAT<sup>fmn</sup> relative to dDAT and hDAT WT brains, as well as in hDAT WT brains in the presence of cocaine. ( $F_{(3,18)} = 9.341$ ,  $p = 0.0006$ ;  $n = 3-7$ ). (B) DA uptake in intact brains of DAT<sup>fmn</sup>, dDAT, and hDAT WT flies ( $F_{(2,9)} = 25.75$ ,  $p = 0.0002$ ;  $n = 4$ ). (C) AMPH-induced locomotion measured by beam crossing detection recorded over a 60 min time period in DAT<sup>fmn</sup>, dDAT and hDAT WT flies (Interaction  $F_{(2,24)} = 52.66$ ,  $p < 0.0001$ ;  $n = 5$ . Data represent mean  $\pm$  SEM. One-way ANOVA with Tukey's multiple comparison test (A)-(B); Two-way ANOVA with Tukey's multiple comparison test (C). \*  $p < 0.05$ ; \*\*  $p < 0.01$ ; \*\*\*  $p < 0.001$ ; \*\*\*\*  $p < 0.0001$ .

### Supplementary Figure 2: Related to Fig 4A.

(A) Distances between IC residues in angstroms ( $\text{\AA}$ ) for LeuT WT, R375A, R375C, and R375D. (B) Rosetta scores represent the average scores of the top 5% of models.  $\Delta\Delta G$  values are in Rosetta Energy Units (REUs). (C) Rosetta modeling of LeuT R375C, where protein backbones are represented in *grey*, amino acid side chains in *green*, K189 in *blue* and R375C in *magenta*. All corresponding polar contacts between side chain or backbone atoms in each model are represented as dashed lines in *black*. (D) REU versus RMSD diagrams were obtained from 1000 Rosetta Flex  $\Delta\Delta G$  trajectories for LeuT WT (*left*) and LeuT R375A (*right*). The RMSD between the protein backbone and heavy side chain atoms within a 10  $\text{\AA}$  distance of R375 and R375A was calculated to show the correlation between the energy-optimized models and the experimental model.

### Supplementary Figure 3: Related to Fig 4B.

Crystallographic data for LeuT WT and R375A regarding data collection, model building, and refinement statistics.

#### **Supplementary Figure 4: Related to Fig 6.**

(A) Model of hDAT R445D showing the formation of a channel-like intermediate promoted by the opening of the IC vestibule. In hDAT R445D, three Na<sup>+</sup> ions bind along the transport lumen (two diffusing from the IC region, and one from the EC region). The region enclosed in the yellow ellipse is more exposed to the cytosol relative to WT, allowing Na<sup>+</sup> and water entry. Hydrated regions inside the transporter are indicated in *gray* shaded areas with explicit water molecules displayed in spheres and lines (CPK format). The conformation shown is a snapshot (100 ns) taken from the simulation trajectory illustrated in B-D. (B) Time evolution of distances between Na<sup>+</sup> and D79. (C) Time evolution of distances between the D476-R85 salt-bridge on the EC side show that this interaction shortens over time (EC gate closure). The distances between D436-R60 on the IC side increase intermittently (IC gate opening). Interestingly, a new salt bridge between D445 and K257 is formed intermittently. (D) Time evolution of interhelical distances between EC-exposed TM1b-TM10 and TM6a-TM10 shows that the EC region remains exposed to solvent with reduced opening, whereas IC-exposed TM1a-TM6b shows that the IC region is predominantly closed with a slight opening indicated by the increase in TM6b-TM9 distance.

#### **Supplementary Figure 5: R445A substitution impairs hDAT expression and function.**

(A) Representative immunoblots of surface hDAT (*top left*), total hDAT (*top right*) and corresponding Na-K ATPase (*bottom left*) and actin (*bottom right*) loading controls (n = 4, in triplicate). hDAT expression was normalized to hDAT WT. hDAT R445A displayed significantly impaired surface (p < 0.0001) and total (#) expression relative to hDAT WT (p < 0.0001).

(B) [<sup>3</sup>H]DA saturation curves of DA uptake measured in hDAT WT (*black*) and hDAT R445A (*red*) cells (n = 3, in triplicate). Curves were fit to Michaelis-Menten kinetics to derive K<sub>m</sub> and V<sub>max</sub>. DA

uptake for hDAT R445A was significantly reduced compared with hDAT WT ( $F_{(5,92)} = 22.7$ ,  $p < 0.0001$ ) as were kinetic constants,  $K_m$  and  $V_{max}$  ( $p < 0.0001$ ). **(C)** Left: Representative amperometric traces (DA efflux) recorded in response to AMPH application (10  $\mu$ M, indicated by arrow) from hDAT WT (*black*) and hDAT R445A (*red*) loaded with DA (2 mM, 10 min) via a whole-cell patch electrode in current-clamp. Right: Quantitation of peak amperometric current in hDAT R445A and hDAT WT cells ( $p = 0.002$ ;  $n = 6$ ). Data represent mean  $\pm$  SEM. Welch's t-test (A); Two-way ANOVA with Bonferroni's multiple comparison test: (B). Mann-Whitney Test (C).

### **Supplementary Figure 6: R445D substitution impairs hDAT expression and function.**

**(A)** Representative immunoblots of surface hDAT (top *left*), total hDAT (top *right*) and corresponding Na-K ATPase (*bottom left*) and actin (*bottom right*) loading controls ( $n = 4$ , in triplicate). hDAT R445D displayed significantly reduced surface ( $p < 0.0001$ ) and total (#) expression relative hDAT WT ( $p < 0.0001$ ). **(B)** [ $^3$ H]DA uptake was measured in hDAT WT (*black*), hDAT R445D (*green*) cells ( $n = 3$ , in triplicate). Curves were fit to Michaelis-Menten kinetics to derive  $K_m$  and  $V_{max}$ . DA uptake for hDAT R445D was significantly reduced compared with hDAT WT ( $F_{(5,94)} = 42.1$ ,  $p < 0.0001$ ), as were the kinetic constants,  $K_m$  and  $V_{max}$  ( $p < 0.0001$ ). **(C)** Left: Representative amperometric traces (DA efflux) recorded in response to AMPH application (10  $\mu$ M, indicated by arrow) from hDAT WT (*black*) and hDAT R445D (*green*) cells loaded DA (2 mM, 10 min) with a whole-cell patch electrode. Right: Peak current amplitudes illustrated a significant reduction in DA efflux recorded from hDAT R445D relative hDAT WT ( $p = 0.002$ ;  $n = 6$ ). Data represent mean  $\pm$  SEM. Welch's t-test (A); Two-way ANOVA with Bonferroni's multiple comparison test: (B). Mann-Whitney Test (C).

### **Supplementary Movies: hDAT WT and hDAT R445C flies in flight.**

Media illustrates hDAT WT and hDAT R445C flies initiating flight. Media was recorded using a high-speed camera (2000 fps). Videos displayed are slowed down from the “start” to “stop” time of take-off to ease visualization.

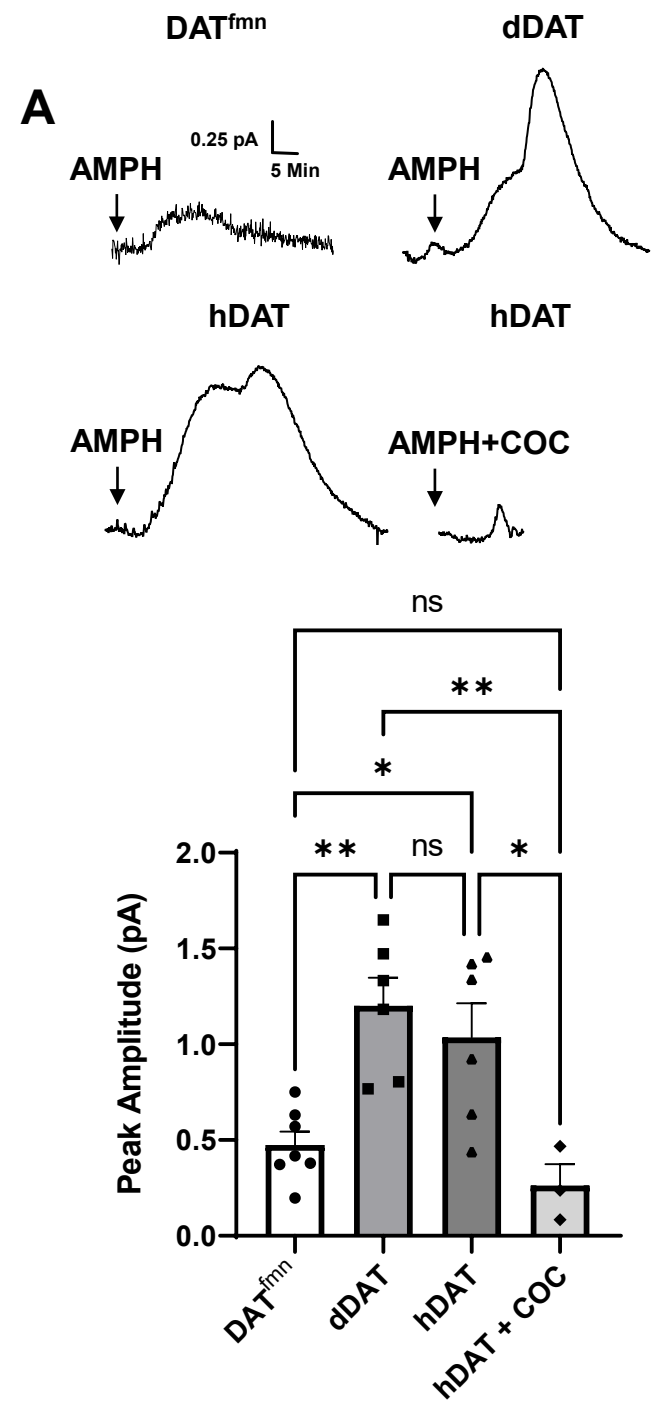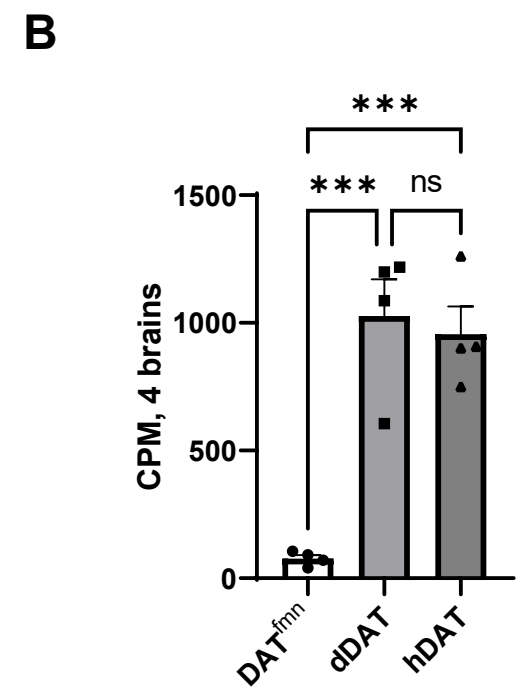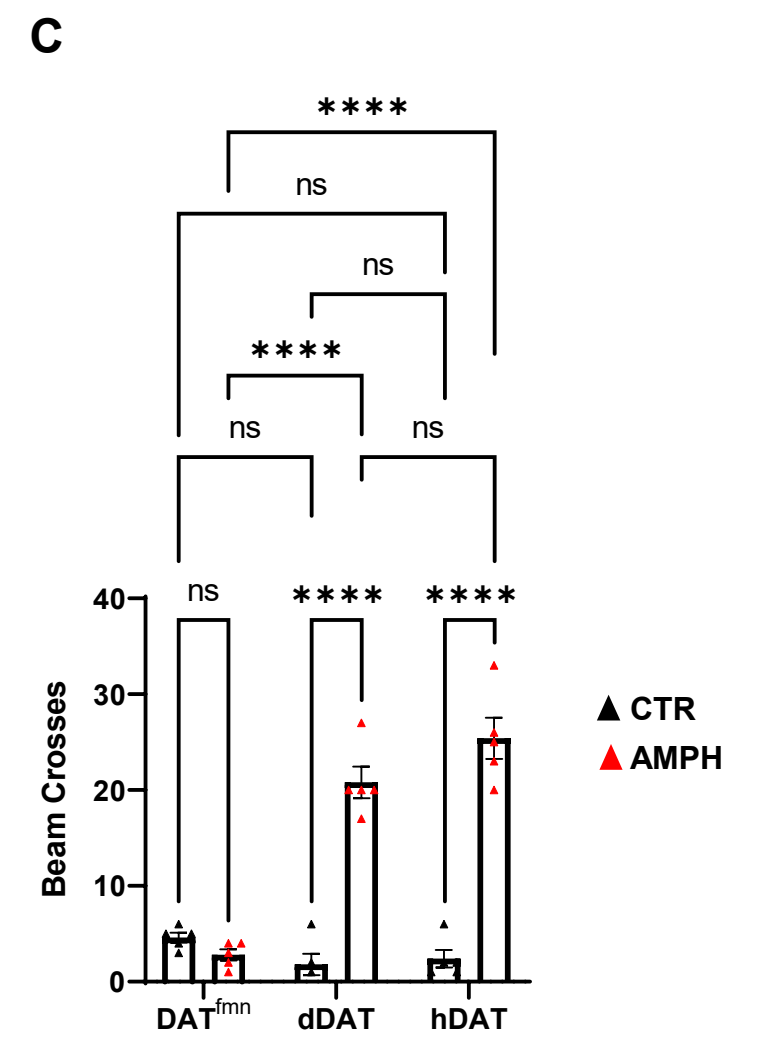

## Supplementary Figure 2

A

### Rosetta Distance Calculations of LeuT R375A/C/D

|           | WT             | R375A | R375C | R375D |
|-----------|----------------|-------|-------|-------|
|           | distance ( Å ) |       |       |       |
| R375-I184 | 2.5            | 6     | 3.3   | 4.7   |
| R375-E6   | 2.1            | 5.4   | 5.7   | 4.2   |
| E6-I187   | 1.9            | 1.9   | 1.9   | 1.8   |
| R5-D369   | 2              | 2     | 2.1   | 2.1   |
| K189-E6   | 8.2            | 7.0   | 9.9   | 8.5   |

B

### Rosetta $\Delta\Delta G$ Calculations of LeuT R375A/C/D

| WT                | R375A             |                                    | R375C             |                                    | R375D             |                                    |
|-------------------|-------------------|------------------------------------|-------------------|------------------------------------|-------------------|------------------------------------|
| <u>score</u>      | <u>score</u>      | <u><math>\Delta\Delta G</math></u> | <u>score</u>      | <u><math>\Delta\Delta G</math></u> | <u>score</u>      | <u><math>\Delta\Delta G</math></u> |
| -2300.2 $\pm$ 4.4 | -2295.8 $\pm$ 4.3 | 4.4                                | -2295.4 $\pm$ 4.5 | 4.8                                | -2294.6 $\pm$ 5.2 | 5.6                                |

C

LeuT R375C

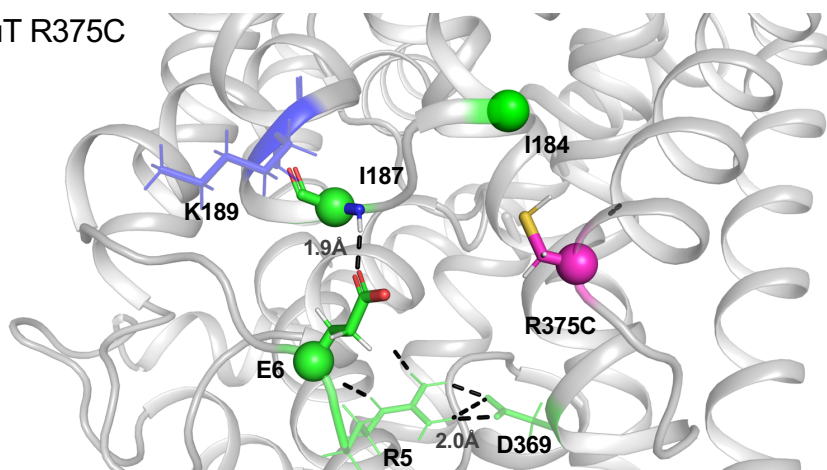

D

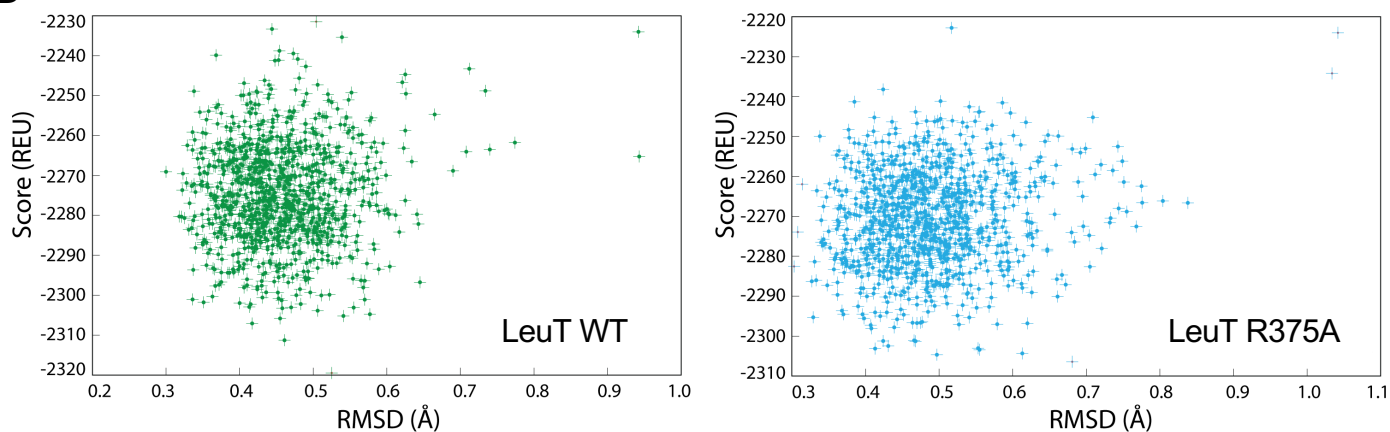



## Supplementary Figure 3

bioRxiv preprint doi: <https://doi.org/10.1101/2021.03.09.434693>; this version posted March 10, 2021. The copyright holder for this preprint (which was not certified by peer review) is the author/funder, who has granted bioRxiv a license to display the preprint in perpetuity. It is made available under aCC-BY 4.0 International license.

|                                                      | LeuT WT                | LeuT R375A             | LeuT R375D             |
|------------------------------------------------------|------------------------|------------------------|------------------------|
| <b>PDB ID:</b>                                       | 7LQJ                   | 7LQK                   | 7LQL                   |
| <b>Data collection</b>                               |                        |                        |                        |
| Space group                                          | C121                   | C121                   | C121                   |
| Cell dimensions                                      |                        |                        |                        |
| <i>a, b, c</i> (Å)                                   | 88.48, 86.87,<br>81.14 | 87.58, 86.62,<br>80.99 | 86.63, 87.06,<br>80.59 |
| $\alpha, \beta, \gamma$ (°)                          | 90.00, 96.09,<br>90.00 | 90.00, 95.64,<br>90.00 | 90.00, 95.32,<br>90.00 |
| Resolution (Å)                                       | 43.99 – 2.1            | 47.31 – 2.1            | 47.22 – 2.6            |
| <i>R</i> <sub>sym</sub> or <i>R</i> <sub>merge</sub> | 0.06 (0.54)            | 0.06 (0.86)            | 0.26 (2.18)            |
| <i>I</i> / $\sigma$ <i>I</i>                         | 14.9 (3.0)             | 11.8 (1.6)             | 7.6(2)                 |
| CC1/2                                                | 0.99 (0.89)            | 0.99 (0.71)            | 0.99 (0.69)            |
| Completeness (%)                                     | 99.4 (93.5)            | 100 (100)              | 99 (98.9)              |
| Redundancy                                           | 7.1 (6.9)              | 5.1 (5.2)              | 7.1 (7.4)              |
| <b>Refinement</b>                                    |                        |                        |                        |
| Resolution (Å)                                       | 43.43 – 2.14           | 43.58– 2.1             | 43.53– 2.6             |
| No. reflections                                      | 33365                  | 35211                  | 18223                  |
| <i>R</i> <sub>work</sub> / <i>R</i> <sub>free</sub>  | 17.77/20.34            | 18.79/20.92            | 19.89/23.99            |
| No. atoms                                            | 4247                   | 4170                   | 4085                   |
| Protein                                              | 4019                   | 4011                   | 3976                   |
| Ligand/ion                                           |                        |                        |                        |
| Ligand                                               | 94                     | 102                    | 77                     |
| Na                                                   | 2                      | 2                      | 2                      |
| water                                                | 135                    | 57                     | 32                     |
| <i>B</i> -factors                                    | 47.75                  | 52.63                  | 55.03                  |
| Protein                                              | 46.54                  | 51.55                  | 54.67                  |
| Ligand/ion                                           | 84.95                  | 94.62                  | 74.36                  |
| R.m.s. deviations                                    |                        |                        |                        |
| Bond lengths (Å)                                     | 0.009                  | 0.004                  | 0.006                  |
| Bond angles (°)                                      | 0.92                   | 0.63                   | 0.69                   |
| Ramachandran (%)                                     |                        |                        |                        |
| Favored                                              | 97.60                  | 98.20                  | 95.77                  |
| Allowed                                              | 2.40                   | 1.80                   | 4.02                   |
| Disallowed                                           | 0.00                   | 0.00                   | 0.20                   |

## Supplementary Figure 4

A

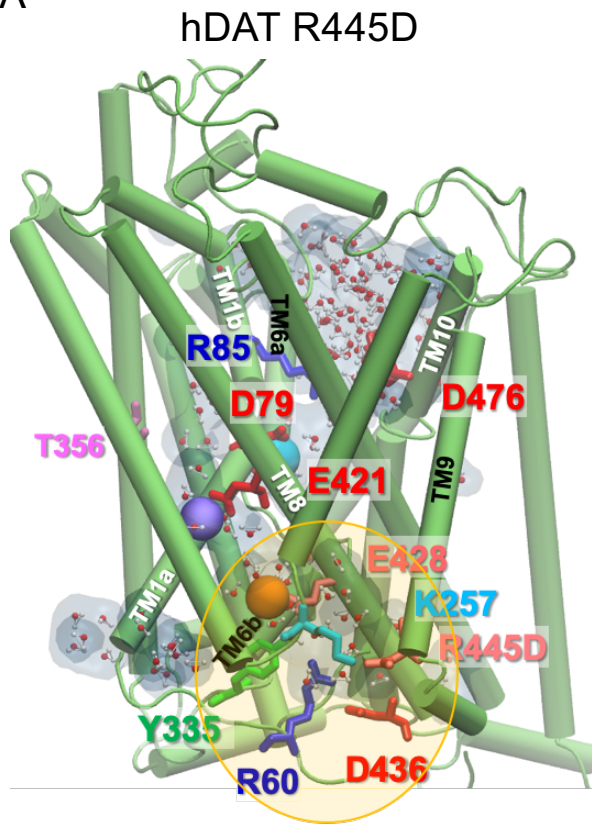

B

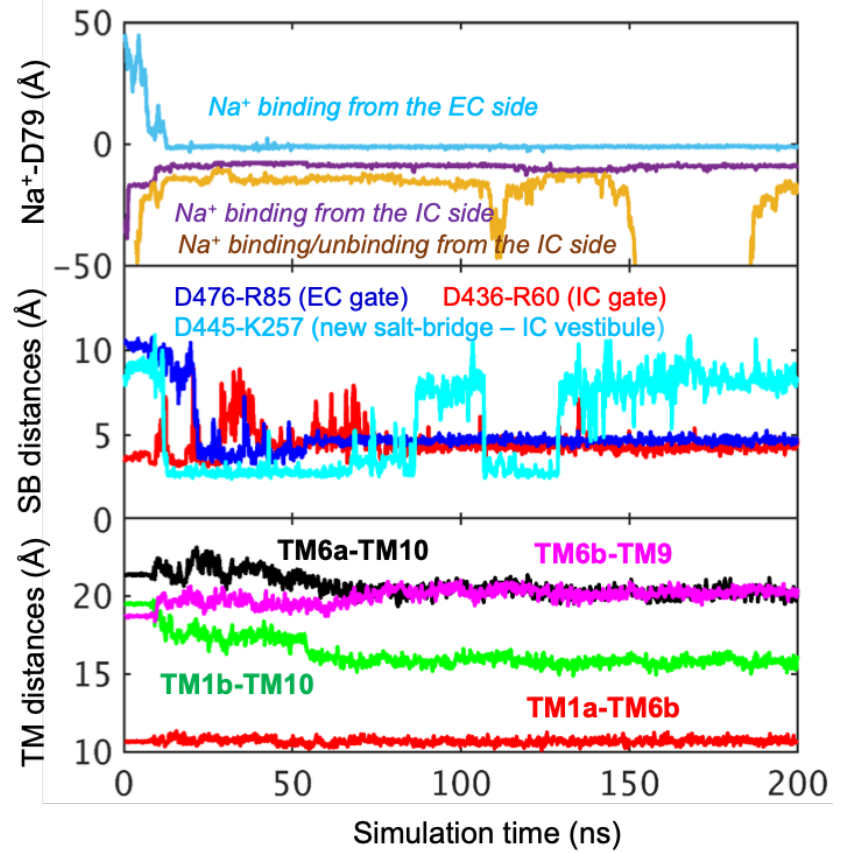

## Supplementary Figure 5

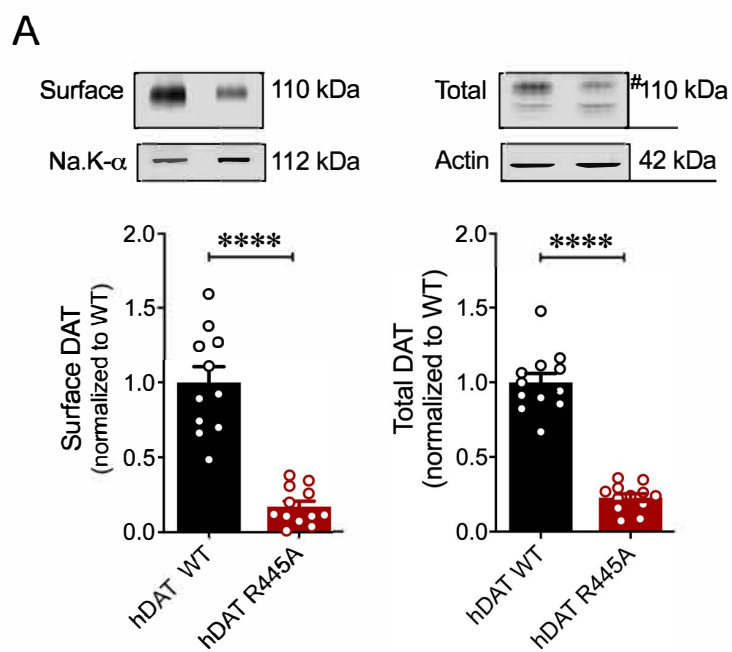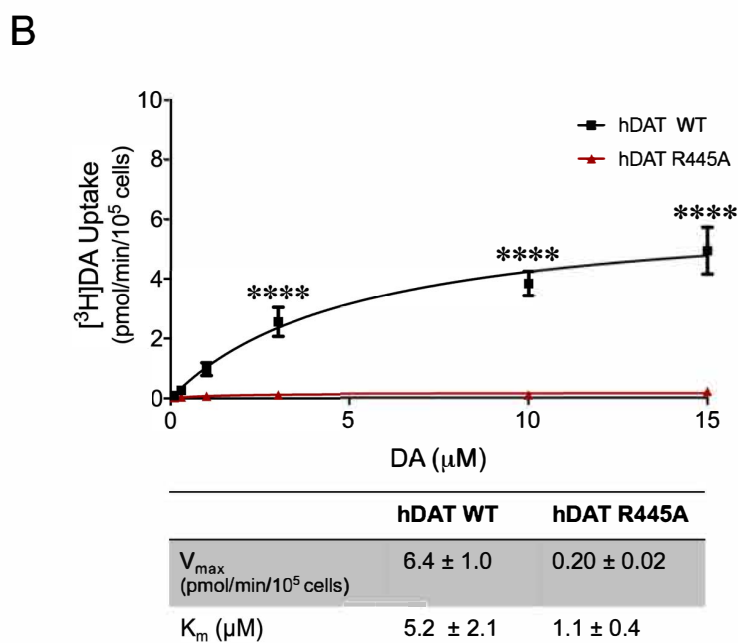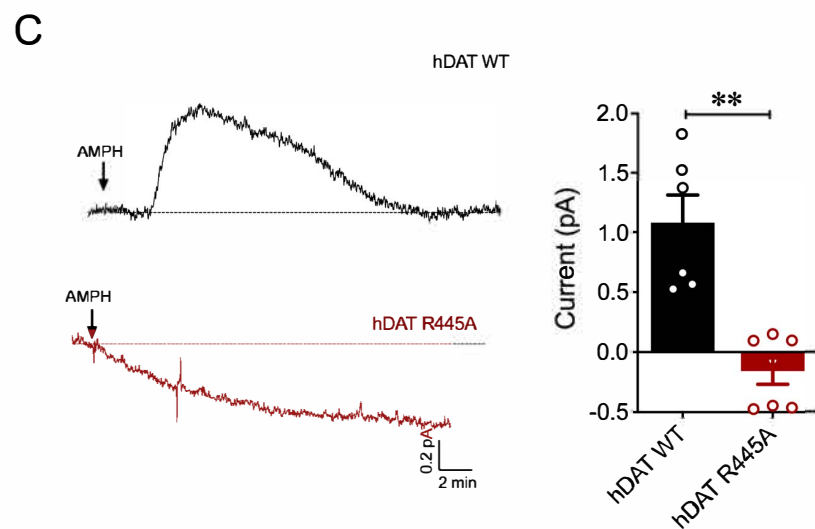

## Supplementary Figure 6

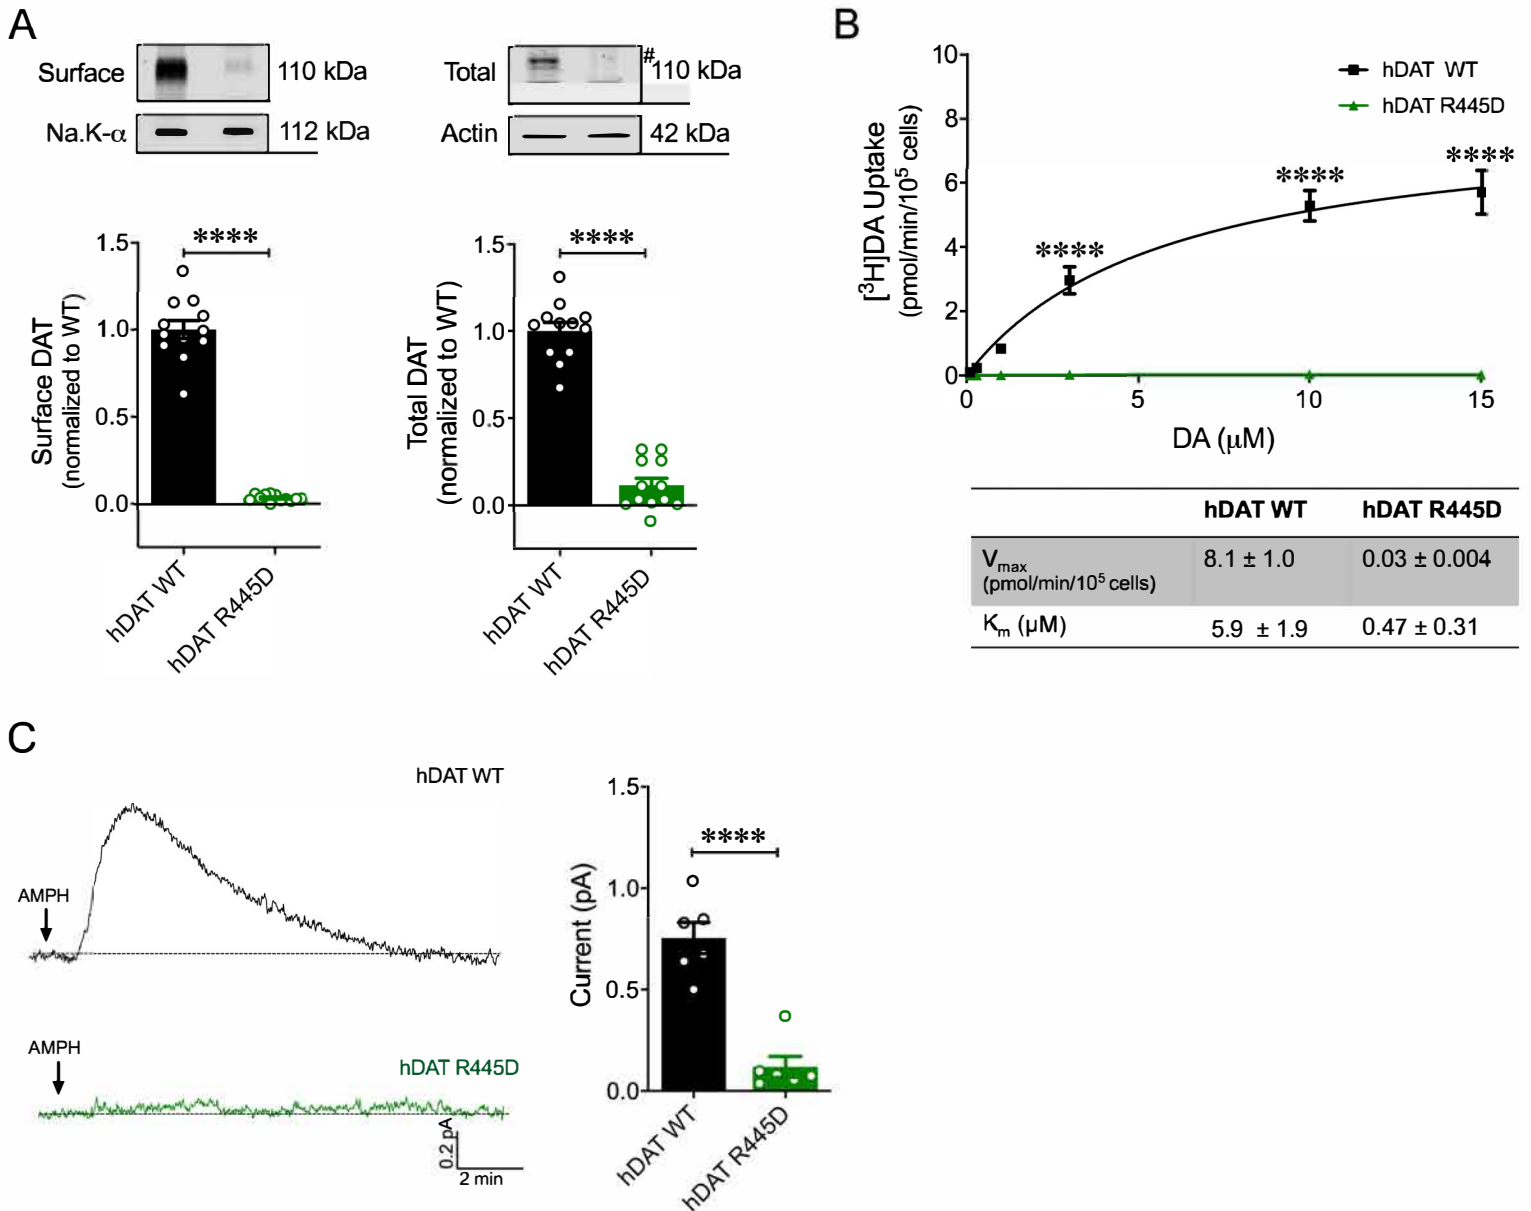

Source: https://biorxiv.org/content/10.1101/2021.03.09.434693v1.full.pdf
